1  
2  
3  
4  
5  
6  
7  
8  
9  
10  
11  
12  
13  
14  
15  
16  
17  
18  
19  
20  
21  
22  
23

**The molecular pathogenesis of superoxide dismutase 1-linked ALS is promoted by low oxygen tension**

Isil Keskin<sup>1</sup>, Elin Forsgren<sup>2</sup>, Manuela Lehmann<sup>2</sup>, Peter M. Andersen<sup>2</sup>, Thomas Brännström<sup>1</sup>, Dale J. Lange<sup>3</sup>, Matthis Synofzik<sup>4,5</sup>, Ulrika Nordström<sup>2</sup>, Per Zetterström<sup>6</sup>, Stefan L. Marklund<sup>6,\*</sup> & Jonathan D. Gilthorpe<sup>2,\*\*</sup>

- 1 Department of Medical Biosciences Pathology, Umeå University, 90185 Umeå, Sweden
  - 2 Department of Pharmacology and Clinical Neuroscience, Umeå University, 90187 Umeå, Sweden
  - 3 Department of Neurology, Hospital for Special Surgery and Weill Cornell Medical Center, New York, NY, USA
  - 4 Department of Neurodegenerative Diseases, Hertie Institute for Clinical Brain Research, University of Tübingen, Germany
  - 5 German Research Center for Neurodegenerative Diseases (DZNE), 72076 Tübingen, Germany
  - 6 Department of Medical Biosciences, Clinical Chemistry, Umeå University, 90185 Umeå, Sweden
- \* Corresponding author. Tel: +46 90 7851239; E-mail: stefan.marklund@umu.se
- \*\* Corresponding author. Tel: +46 90 7854439; E-mail: jonathan.gilthorpe@umu.se

24 **Abstract**

25 Mutations that destabilize superoxide dismutase 1 (SOD1) are a cause of amyotrophic lateral  
26 sclerosis (ALS). SOD1, which is located in the reducing cytosol, contains an oxidized  
27 disulfide bond required for stability. We show that the bond is an Achilles heel of the protein  
28 because it is sensitive to the oxygen tension. Culture of ALS patient-derived fibroblasts,  
29 astrocytes and induced pluripotent stem cell-derived mixed motor neuron and astrocyte  
30 cultures (MNACs) under lowered oxygen tensions caused reductive bond cleavage and  
31 misfolding. The effects were greatest in cells expressing mutant SOD1s, but also occurred in  
32 wild type SOD1 in cultures derived from patients carrying ALS-linked mutations in *C9orf72*,  
33 *FUS* and *TBK1*, as well as from controls. MNACs showed a greater response than the other  
34 cell types, including enhanced SOD1 aggregation, in line with the vulnerability of the motor  
35 system. Our results show that oxygen tension is a principal determinant of SOD1 stability and  
36 shed light on how risk factors for ALS, such as aging and other conditions causing reduced  
37 vascular perfusion, could lead to disease initiation and progression.

38

39

40

41 **Running title** Low oxygen drives SOD1 aggregation

42

43 **Keywords** Amyotrophic lateral sclerosis; disulfide bond; oxygen; protein aggregation;  
44 superoxide dismutase 1

45

46 **Subject categories** Neuroscience; Molecular Biology of Disease

47

48

49

50

## 51 **Introduction**

52 Amyotrophic lateral sclerosis (ALS) is characterized by adult-onset progressive degeneration  
53 of upper and lower motor neurons (MN) and their associated tracts. Usually the disease begins  
54 focally and then spreads contiguously, resulting in progressive paralysis and death from  
55 respiratory failure (Charcot, 1873). Mutations in the gene encoding the ubiquitously  
56 expressed, free radical scavenging enzyme superoxide dismutase 1 (SOD1) cause ALS  
57 (Rosen et al., 1993), and are found in 1-9% of patients (Andersen & Al-Chalabi, 2011). Of  
58 over 200 mutations identified, 174 are missense and result in SOD1 variants of which most in  
59 large, although variable proportions are natively folded (Andersen et al., 1995, Sato et al.,  
60 2005, Synofzik et al., 2012). Twenty-seven encode mutants with disruptive changes  
61 (insertions, deletions and truncations) that impede native folding. Most of the truncated  
62 mutants lack C146 and thereby the C57-C146 disulfide bond, which is critical for SOD1  
63 stability. These mutants are highly unstable and rapidly degraded (Birve et al., 2010, Jonsson  
64 et al., 2004, Keskin et al., 2017, Keskin et al., 2016, Sato et al., 2005). Hence, the collective  
65 genetic and biochemical evidence from patients infers that any common ALS-causing SOD1  
66 species is disordered, lacks the C57-C146 disulfide bond and is only present in minute  
67 amounts.

68 Neuronal inclusions containing aggregated SOD1 are a hallmark of ALS, both in patients  
69 and in transgenic (Tg) animal models expressing mutant human SOD1s (Kato et al., 2000).  
70 We have shown that two structurally distinct strains of SOD1 aggregates form in Tg mouse  
71 models (Bergh et al., 2015), and that both transmit spreading, templated SOD1 aggregation  
72 and fatal ALS-like disease in a prion-like manner (Bidhendi et al., 2016). Similarly, others  
73 have shown seeding effects of spinal cord extracts from end-stage SOD1 Tg mice (Ayers et  
74 al., 2014, Ayers et al., 2016). The templated growth of SOD1 aggregation depends on  
75 disordered, disulfide-reduced SOD1 species as building blocks (Chattopadhyay et al., 2008,  
76 Chattopadhyay et al., 2015, Furukawa et al., 2008, Lang et al., 2012). This could represent the  
77 core pathogenic mechanism in SOD1-induced ALS.

78 Human SOD1 is primarily localized in the cytosol and is composed of two equal 153  
79 amino acid-long subunits, each containing 1 Cu and 1 Zn ion as well as the stabilizing C57-  
80 C146 disulfide bond. SOD1 is an ancient enzyme and was secreted to the oxidizing  
81 extracellular/periplasmic space in early unicellular organisms, as well as in current  $\alpha$ -bacteria  
82 (Bordo et al., 1994, Miller, 2012). However, the cytosol is strongly reducing and the C57-  
83 C146 bond could be an evolution-related Achilles heel of eukaryotic SOD1, and a critical

84 determinant of its role in ALS. Absence of the disulfide bond promotes misfolding and  
85 aggregation of SOD1 *in vitro* (Chattopadhyay et al., 2008, Chattopadhyay et al., 2015,  
86 Furukawa et al., 2008, Keskin et al., 2016, Lang et al., 2012). Moreover, aggregated as well as  
87 soluble misfolded SOD1 species in the central nervous system (CNS) of SOD1 Tg models  
88 lack the bond (Bergemalm et al., 2010, Karch et al., 2009, Zetterström et al., 2013,  
89 Zetterstrom et al., 2007).

90 If the C57-C146 disulfide bond in SOD1 were in equilibrium with reduced and oxidized  
91 glutathione (GSH/GSSG) - the principal redox couple in the cytosol - it would be almost  
92 completely reduced (Mercatelli et al., 2016, Schwarzlander et al., 2016). Instead, the status of  
93 C57-C146 seems to be determined kinetically with oxidation provided by O<sub>2</sub> and catalyzed by  
94 copper chaperone for SOD (CCS) (Culotta et al., 1997, Fetherolf et al., 2017, Furukawa et al.,  
95 2004). Reduction is provided by glutaredoxin-1 using reducing equivalents from GSH  
96 (Carroll et al., 2006). Thus, cellular O<sub>2</sub> tension might be a major determinant of SOD1  
97 disulfide bond stability.

98 Age is the principal non-hereditary risk factor for ALS, as well as most other  
99 neurodegenerative diseases. It is associated with reduced perfusion in the CNS owing to  
100 vascular wall degeneration and neurovascular unit dysfunction (Iadecola, 2017). We  
101 hypothesized that local reductions in O<sub>2</sub> tension caused by impaired perfusion may have an  
102 effect on SOD1 stability. To test this idea we used *in vitro* cell culture models of ALS  
103 including fibroblasts from ALS patients carrying mutations in *SOD1*, other ALS-linked genes  
104 and from non-disease controls. We also examined neural cells including primary patient-  
105 derived astrocytes and mixed motor neuron and astrocyte cultures (MNACs) derived from  
106 induced pluripotent stem cells (iPSCs). We found that low O<sub>2</sub> tensions markedly increased  
107 disulfide bond reduction, misfolding and aggregation of SOD1 in a time- and concentration-  
108 dependent manner.

109

## 110 **Results**

### 111 **Low oxygen tensions promote misfolding of SOD1 in patient-derived cells**

112 Previously, we have utilized ALS patient-derived dermal fibroblasts as an *in vitro* model to  
113 study misfolding under physiological SOD1 expression levels (Keskin et al., 2016). Cells  
114 cultured *in vitro* are typically maintained in humidified ambient air supplemented with 5%  
115 (v/v) CO<sub>2</sub>, resulting in an O<sub>2</sub> tension of approximately 19%. However, under normal

116 conditions the O<sub>2</sub> tension in the CNS is much lower, ranging between 0.2 and 5% (Erecinska  
117 & Silver, 2001, Lyons et al., 2016). Moreover, an age-related disruption in perfusion might  
118 lead to further reductions in local O<sub>2</sub> tensions. Therefore, we examined the SOD1 misfolding  
119 response in fibroblast lines carrying ALS-linked *SOD1* mutations and cultured at reduced O<sub>2</sub>  
120 tensions for 24 h (Fig 1A and Table EV1).

121 Misfolded SOD1 was quantified with a specific ELISA (misELISA) (Zetterström et al.,  
122 2011). Lines carrying the *SOD1*<sup>N86S</sup> and *SOD1*<sup>E78\_R79insSI</sup> mutations showed distinct O<sub>2</sub>  
123 concentration responses, with the highest levels of misfolding detected at 1% O<sub>2</sub> (Fig 2A).  
124 Interestingly, no increase in SOD1 misfolding was seen in a line carrying the *SOD1*<sup>G127Gfs\*7</sup>  
125 (G127X) truncating mutation, which results in a protein that lacks the C57-C146 disulfide  
126 bond and cannot fold properly (Fig 2A and Fig EV1A).

127 We next investigated the temporal response of misfolding to low O<sub>2</sub> and detected a  
128 significant increase in misfolded SOD1 at 1% O<sub>2</sub> after 4 h, reaching a maximum after 8 h,  
129 which was maintained at 24 h (Fig 2B). Quantification of total SOD1 revealed that increased  
130 misfolding was not due to increased SOD1 expression (Fig EV1B). To address whether the  
131 increase in misfolding was reversible, we quantified misfolded SOD1 at different time points  
132 after returning cells from 24 h at 1% O<sub>2</sub> to 19% O<sub>2</sub>. A rapid reversal was observed in the  
133 *SOD1*<sup>G93A</sup> line with a misfolded SOD1 half-life of ~15 min, returning to baseline after ~1 h  
134 (Fig 2C). Reversal of misfolding of wild-type SOD1 (*SOD1*<sup>WT</sup>) in a control line was even  
135 more rapid (Fig 2C). No significant effects were seen in the *SOD1*<sup>G127X</sup> line (Fig 2C). Hence,  
136 we concluded that the misfolding response was inversely proportional to the O<sub>2</sub> tension. It  
137 was also time-dependent, reversible, and appeared to require the C57-C146 disulfide bond.

138 To probe the misfolding response in more detail, we next analyzed a panel of control and  
139 patient-derived fibroblast lines cultured under conditions where the misfolding response was  
140 maximal (1% O<sub>2</sub>, 24 h; Fig 2D and Fig EV1C). A significant increase in misfolded SOD1 was  
141 seen in all lines that carried full-length mutant SOD1s and ranged from 1.5 – 3.5-fold.  
142 Significant increases of a smaller magnitude were also observed in most control lines, as well  
143 as those from patients carrying ALS-linked *C9orf72*, *FUS* or *TBK1* mutations, which only  
144 contain *SOD1*<sup>WT</sup>. The only fibroblasts that did not show significant increases were lines  
145 carrying *SOD1* mutations resulting in truncations and the absence of C146: *SOD1*<sup>G127X</sup> and  
146 *SOD1*<sup>D125Tfs\*24</sup>.

147 To investigate the misfolding response in patient-derived neural cells, we generated  
148 primary astrocytes from the lateral ventral horn of an ALS patient heterozygous for the  
149 *SOD1*<sup>A4V</sup> mutation (Fig 1A, Fig 2E, Fig EV1 D and E and Table EV1) (Haidet-Phillips et al.,

150 2011). The level of misfolded SOD1 increased 2-fold when these cells were cultured at 1% O<sub>2</sub>  
151 compared to 19% for 24 h (Fig 2E and Fig EV1D), which was similar to the increase seen in  
152 fibroblasts from another *SOD1*<sup>A4V</sup> patient (Fig 2D and Fig EV1C).

153

### 154 **An enhanced SOD1 misfolding response in patient-derived motor neuron/astrocyte** 155 **cultures**

156 Since ALS preferentially targets the motor system, we reprogrammed a subset of the patient-  
157 derived fibroblast lines to iPSCs and differentiated these to MNACs (Fig 1A and B and Table  
158 EV1). Recently we have found that SOD1 misfolding is enhanced in MNACs compared to the  
159 corresponding fibroblasts, iPSCs and iPSC-derived sensory neurons (Forsgren et al., under  
160 revision). After 10 days in culture post-differentiation (Day 25; Fig 1B), MNACs contained  
161 ~5% neurons expressing tubulin beta 3 class III (TUBB3; Fig EV2 A and B). A large  
162 proportion of these neurons (78 – 84%) co-expressed the motor neuron markers ISL LIM  
163 homeobox 1/2 (ISL1/2) and non-phosphorylated neurofilament-H (SMI32), representing a  
164 limb innervating subtype that are highly susceptible to ALS (Amoroso et al., 2013).

165 We first titrated the dose-response of SOD1 misfolding to O<sub>2</sub> tension in MNACs from  
166 control, *SOD1*<sup>A4V</sup> and *SOD1*<sup>G93A</sup> lines. A significant increase in misfolding was detected at  
167 ≤4% and was maximal at 2% O<sub>2</sub>, which was enhanced in MNACs compared to fibroblasts in  
168 all three lines (Fig 3A). Under the same conditions used for fibroblasts (1% O<sub>2</sub> for 24 h), a  
169 significant degree of axonal fragmentation was observed (data not shown), indicative of  
170 neuronal stress. However, since axonal morphology (Fig EV2B), cellular ATP levels (Fig  
171 EV3A) and viability (Fig EV3B) were not significantly affected by exposure to 2% O<sub>2</sub> for 24  
172 h, this was used to investigate the misfolding response in MNACs from ALS patients.

173 Large increases in SOD1 misfolding, ranging up to 10-fold, were induced in MNACs  
174 following exposure to 2% O<sub>2</sub> for 24 h (Fig 3B and Fig EV4). The largest effects were found  
175 in several of the lines expressing full-length mutant SOD1s (N86S, A4V, and G93A).  
176 However, in contrast to fibroblasts a robust 3 – 4-fold increase was also seen in controls  
177 expressing *SOD1*<sup>WT</sup> and in MNACs that were heterozygous for *SOD1*<sup>G127X</sup> or *SOD1*<sup>D125Tfs\*24</sup>  
178 mutations. This is likely to represent enhanced misfolding of *SOD1*<sup>WT</sup> in MNACs (Forsgren et  
179 al., under revision), since the level of mutant protein did not increase in the *SOD1*<sup>G127X</sup> line  
180 (Fig EV5).

181 Our previous study of patient-derived fibroblasts showed that misfolded SOD1 is primarily  
182 degraded by the proteasome (Keskin et al., 2016). However, exposure to low O<sub>2</sub> tension did

183 not lead to a reduction in proteasome activity in MNAC extracts (Fig EV3C). Nor were there  
184 increases in SOD1<sup>G127X</sup> protein in either soluble (Fig EV5) or detergent-insoluble (Fig EV6B)  
185 fractions, which both increased greatly upon proteasome inhibition (Keskin et al., 2016).  
186 Inhibition of the proteasome also leads to copious aggregation of SOD1<sup>D125Tfs\*24</sup> in fibroblasts  
187 (Keskin et al., 2016), whereas no changes were found here in response to low O<sub>2</sub> tension (see  
188 below; Fig 7). Hence, increased SOD1 misfolding at low O<sub>2</sub> tension could not be attributed to  
189 a reduction in proteasome activity.

190

### 191 **Low oxygen tension promotes reductive cleavage of the disulfide bond**

192 We have shown that reduction of the C57-C146 bond is a prerequisite for SOD1 misfolding in  
193 the CNS (Zetterström et al., 2013, Zetterstrom et al., 2007). To examine the status of the  
194 disulfide bond in MNACs we determined the proportions of disulfide-reduced and oxidized  
195 SOD1 by non-reduced western blotting (Fig 4A and B). Culture at 2% O<sub>2</sub> for 24 h resulted in  
196 significant increases in disulfide-reduced SOD1, both in control lines expressing SOD1<sup>WT</sup> and  
197 those expressing mutant SOD1s. However, this was not the case for the SOD1<sup>H46R</sup> line, where  
198 a large proportion of the mutant protein is known to be disulfide-reduced under control  
199 conditions (Winkler et al., 2009).

200

### 201 **Misfolded SOD1 in MNACs lacks the disulfide bond**

202 To confirm that misfolded SOD1 lacks the C57-C146 disulfide bond, we immunocaptured  
203 SOD1 from extracts of MNACs, which had been cultured at 19% or 2% O<sub>2</sub>, using the same  
204 antibody (SOD1 aa 24-39) and capture conditions (1 h at 23°C) used in the misELISA. This  
205 antibody reacts with disordered SOD1, independent of the C57-C146 disulfide status  
206 (Forsberg et al., 2010). Disulfide-reduced and oxidized SOD1 were quantified by non-reduced  
207 western blotting (Fig 4C). Input samples from control, SOD1<sup>G93A</sup> and SOD1<sup>A4V</sup> MNACs  
208 contained a majority of oxidized and a small proportion of reduced SOD1, which increased at  
209 low O<sub>2</sub> conditions. Notably, the misfolded SOD1-specific antibody only captured disulfide-  
210 reduced SOD1. In control MNACs, this was not detectable at 19% O<sub>2</sub> but increased at 2% O<sub>2</sub>  
211 to ~1.4% of the disulfide reduced SOD1 in the input sample. In SOD1<sup>G93A</sup> and SOD1<sup>A4V</sup>  
212 MNACs, immunocaptured disulfide reduced misfolded SOD1 increased substantially (to 21%  
213 and 10% of the input samples at 2% O<sub>2</sub>, respectively). Hence, in patient-derived MNACs, the  
214 majority of disulfide-reduced SOD1 retained an ordered structure. This agrees with

215 observations in the spinal cord of SOD1 Tg mouse models, where approximately 5 – 10% of  
216 disulfide-reduced human SOD1 is disordered (Zetterström et al., 2013, Zetterstrom et al.,  
217 2007).

218

### 219 **Low oxygen tension does not alter determinants of SOD1 redox status**

220 Oxidation of the C57-C146 disulfide bond is catalyzed by CCS (Culotta et al., 1997, Fetherolf  
221 et al., 2017, Furukawa et al., 2004), and it can be reduced by a mechanism involving reducing  
222 equivalents from GSH via glutaredoxin-1 (Carroll et al., 2006). To determine whether these  
223 factors were affected by low O<sub>2</sub> tension and responsible for increased misfolding, we  
224 analyzed their levels in MNACs grown at 19% vs 2% O<sub>2</sub>. No significant changes were  
225 detected in CCS or glutaredoxin-1 levels by western blotting (Fig 5A and B and Fig EV7).  
226 We next quantified GSH and GSSG in MNACs and fibroblasts (Fig 5C and D). GSH and  
227 GSSG concentrations were higher in MNACs than in fibroblasts, but exposure to low O<sub>2</sub>  
228 tension did not lead to significant changes in GSH or GSSG levels. The concentrations of  
229 GSSG were remarkably high in MNACs, resulting in very low GSH/GSSG ratios, but these  
230 were not affected by O<sub>2</sub> (Fig 5E). Hence, low O<sub>2</sub> tensions do not induce disulfide reduction  
231 and misfolding of SOD1 via gross perturbations of the GSH/GSSG redox couple  
232 (Schwarzlander et al., 2016).

233

### 234 **Maintenance of the disulfide bond and SOD1 structure is oxygen-dependent**

235 Increased misfolding at low O<sub>2</sub> tension could be due to impaired disulfide oxidation of newly  
236 synthesized SOD1, or to reduction of the disulfide bond in the mature protein. To distinguish  
237 the relative contribution of these two possible mechanisms, we compared the misfolding  
238 response in fibroblasts cultured in the absence or presence of the protein synthesis inhibitor  
239 cycloheximide (CHX) for 24 h. No significant effect of CHX on the level of misfolded  
240 SOD1<sup>WT</sup> was seen in control fibroblasts cultured at 19% or 1% O<sub>2</sub> (Fig 6A). In contrast, CHX  
241 treatment led to a large reduction in misfolded SOD1 in the SOD1<sup>G127X</sup> line at both O<sub>2</sub>  
242 tensions (Fig 6B). This confirmed that both the inhibition of protein synthesis, and the  
243 degradation of the disordered SOD1<sup>G127X</sup> mutant protein, was efficient. In the SOD1<sup>G93A</sup> line,  
244 CHX treatment resulted in a significant reduction in misfolded SOD1 at both O<sub>2</sub> tensions.  
245 Hence, a proportion of misfolded SOD1 resulted from a lack of disulfide oxidation in newly  
246 synthesized SOD1<sup>G93A</sup> (Fig 6C). However, the misfolding response was enhanced at 1%



247 compared to 19% O<sub>2</sub> even when protein synthesis was inhibited. Thus, O<sub>2</sub> is also required for  
248 maintenance of the disulfide bond and structure of the existing pool of mature SOD1.

249

### 250 **Low oxygen tension promotes SOD1 aggregation**

251 Since disulfide reduction and misfolding promote SOD1 aggregation (Chattopadhyay et al.,  
252 2008, Furukawa et al., 2008, Lang et al., 2012), we quantified detergent-resistant SOD1  
253 aggregates in both fibroblasts and MNACs. Low levels of aggregation were found in  
254 fibroblasts, which did not increase significantly in response to low O<sub>2</sub> (Fig 7). In contrast, we  
255 found that low O<sub>2</sub> tension induced marked increases in aggregation in MNACs carrying full-  
256 length mutant SOD1s (E78\_R79insSI, N86S, G93A and A4V), but not in SOD1<sup>WT</sup> control  
257 lines or SOD1<sup>L117V</sup>, which has SOD1<sup>WT</sup>-like stability (Synofzik et al., 2012). The *SOD1*<sup>H46R</sup>  
258 mutation disrupts copper binding catalyzed via CCS and impairs formation of the disulfide  
259 bond (Winkler et al., 2009). In agreement, the high level of aggregation present at 19% O<sub>2</sub> in  
260 the SOD1<sup>H46R</sup> line did not change at 2% O<sub>2</sub>. Neither of the lines expressing the C-terminally  
261 truncated mutants that lack the disulfide bond (SOD1<sup>G127X</sup> and SOD1<sup>D125Tfs\*24</sup>), showed  
262 increased aggregation. Hence, increased aggregation correlated closely with increased  
263 misfolding in MNACs expressing full-length mutant SOD1s.

264

### 265 **Discussion**

266 The principal finding of this study is that culture at low O<sub>2</sub> tension leads to remarkably large  
267 increases in SOD1 C57-C146 disulfide bond reduction and misfolding. In addition to being  
268 required for bond formation, we have identified that O<sub>2</sub> is also critical for its maintenance.  
269 Low O<sub>2</sub> tension resulted further in enhanced aggregation in MNACs but not in fibroblasts.  
270 This supports the idea that in human patient-derived models, as well as in Tg mice, the C57-  
271 C146 disulfide bond is indeed an ALS-related Achilles heel of SOD1 in the reducing  
272 environment of the cytosol.

273 The O<sub>2</sub> tensions in the gas phase found to enhance SOD1 misfolding are within the range  
274 considered to be normoxic in human and animal tissues. However, the range of O<sub>2</sub> tensions  
275 present within cultured cells are likely to be lower. This is due to both the rate of O<sub>2</sub> diffusion  
276 through the culture medium and the rate of O<sub>2</sub> consumption by cellular respiration, which  
277 depends on both cellular mass and the rate of oxidative metabolism (Pettersen et al., 2005).  
278 Because these variables are difficult to control for between different cell lines, we chose to

279 compare replicate samples cultured at different O<sub>2</sub> tensions. The cells, which had been  
280 propagated and adapted to growth at 19% O<sub>2</sub>, were tested within a range that was found not to  
281 cause overt toxicity.

282 A study in young resting awake mice has indicated that O<sub>2</sub> tensions in the CNS vary  
283 between 0.2 – 5% (Lyons et al., 2016). Even lower levels were recorded under normal  
284 conditions, e.g. in periarteriolar areas. Considering this great variation found in young mice, it  
285 is reasonable to assume that localized hypoxia could occur transiently, or more chronically, in  
286 elderly humans even in the absence of overt disease.

287 Apart from the strong risk associated with aging, other suggested non-hereditary risk  
288 factors for ALS include smoking (Gallo et al., 2009), CNS trauma, particularly to the motor  
289 cortex (Rosenbohm et al., 2014), embolisations of arteriovenous malformations, transient  
290 ischaemic attack, and stroke (Turner et al., 2016). Strenuous physical activity has also been  
291 suggested to increase the risk for ALS (Chio et al., 2005), although this is contentious (Gallo  
292 et al., 2016). The mechanisms underlying these risk factors are not understood, but a unifying  
293 characteristic could be transient or chronic CNS hypoxia due to reduced vascular perfusion.

294 In *SOD1* ALS mouse models, the average lifespan of homozygous Tg mice is  
295 approximately half that of hemizygous animals (Jaarsma et al., 2000, Jonsson et al., 2004). A  
296 dose-dependence on mutant *SOD1*s also exists for the development of ALS in humans.  
297 Individuals that are homozygous for the *SOD1* mutations L84F, N86S or L126S show earlier  
298 onset and more rapid progression than those that are heterozygous for the same mutation  
299 (Alavi et al., 2013, Boukaftane et al., 1998, Hayward et al., 1998, Kato et al., 2001).  
300 Furthermore, the D90A mutant protein, which has wild type-like stability, typically only  
301 causes ALS in homozygous individuals (Andersen et al., 1996). Hence, a clear link exists  
302 between a doubling of the load of mutant *SOD1* and disease initiation, or progression. The  
303 large increases in misfolded *SOD1* in response to low O<sub>2</sub> tension we report here, particularly  
304 in MNACs, could contribute to the initiation and progression of ALS.

305 Except for *SOD1*<sup>D90A</sup>, the cell lines tested here were derived from individuals heterozygous  
306 for *SOD1* mutations. Whereas *SOD1*<sup>D90A</sup> has a larger electrophoretic mobility, the other full-  
307 length *SOD1* mutants show the same mobility as wild-type *SOD1*. The *SOD1*<sup>D125Tfs\*24</sup> mutant  
308 protein also has the same mobility as *SOD1*<sup>WT</sup> (Keskin et al., 2016). Therefore, these *SOD1*  
309 mutants cannot be distinguished from *SOD1*<sup>WT</sup> by western blotting or in the misELISA  
310 (Keskin et al., 2016). Owing to widely different stabilities and rates of degradation, the levels  
311 of mutant *SOD1*s in cultured human cells vary from comparable to the wild type protein, to  
312 very low (Keskin et al., 2016). Whereas there were no large differences in the proportion of

313 disulfide-reduced SOD1 between *SOD1* mutant and control MNACs, both basal and low O<sub>2</sub>-  
314 enhanced levels of misfolded and aggregated SOD1 were much greater in the *SOD1* mutant  
315 cultures. For the most part, mutant SOD1s most likely contributed substantially to these  
316 enhanced levels.

317 Recent findings *in vivo* suggest that prion-like growth and spread of SOD1 aggregation  
318 could be the primary disease mechanism of SOD1-induced ALS (Ayers et al., 2014, Ayers et  
319 al., 2016, Bidhendi et al., 2016). Disordered SOD1 species would be critical substrates for  
320 both the nucleation and growth of prion-like aggregates. This would have a greater probability  
321 of occurring in areas of the CNS with sustained low O<sub>2</sub> tension. Consistent with this, even a  
322 short (24 h) exposure to low O<sub>2</sub> tension resulted in large increases in SOD1 aggregation in  
323 patient-derived MNACs, which do not overexpress the protein. Typically SOD1  
324 overexpression is required for substantial aggregation to occur (Prudencio et al., 2009).

325 Significant increases in disulfide-reduced and misfolded SOD1 were also seen in cells  
326 from healthy control individuals and cells derived from patients carrying ALS-linked  
327 mutations in other genes. This could be important since there is mounting evidence for  
328 involvement of SOD1<sup>WT</sup> in ALS patients without *SOD1* mutations. Although this is debated  
329 (Da Cruz et al., 2017), several studies have demonstrated inclusions of misfolded SOD1<sup>WT</sup> in  
330 the soma of motor neurons from sporadic as well as familial ALS patients carrying ALS-  
331 linked mutations in other genes (Bosco et al., 2010, Forsberg et al., 2011, Forsberg et al.,  
332 2010, Pokrishevsky et al., 2012). Furthermore, co-culture of motor neurons with primary  
333 astrocytes derived from sporadic ALS patients indicates an involvement of SOD1<sup>WT</sup> in the  
334 disease (Haidet-Phillips et al., 2011), and mice that express human SOD1<sup>WT</sup> at high rate  
335 develop both SOD1 aggregation and a fatal ALS-like disease (Graffmo et al., 2013).

336 SOD1s carrying mutations that affect the C57-C146 disulfide bond should not be affected  
337 directly by low O<sub>2</sub> tension. However, in several mutant *SOD1* Tg models coexpression of  
338 human SOD1<sup>WT</sup> has been found to exacerbate the disease (Deng et al., 2006, Jaarsma et al.,  
339 2000, Prudencio et al., 2010, Wang et al., 2009). Low O<sub>2</sub> tension effects on SOD<sup>WT</sup> might  
340 contribute to the pathology in heterozygous individuals, perhaps through coaggregation of  
341 wild-type and mutant SOD1s.

342 In conclusion, we show that O<sub>2</sub> tension is a principal determinant of SOD1 misfolding and  
343 aggregation. Our findings suggest that CNS areas with low O<sub>2</sub> tension could act as foci for the  
344 initiation or progression of ALS. This mechanism might contribute to the enhanced risk for  
345 the disease associated with aging, as well as other factors that impair vascular perfusion.

346

## 347 **Materials and Methods**

### 348 **Human materials**

349 Samples from patients and non-disease controls (Table EV1), including blood samples for  
350 genotyping and skin biopsies for fibroblast culture, were collected with approval of the  
351 Regional Ethical Review Board in Umeå and in accordance with the principles of the  
352 Declaration of Helsinki (WMA, 1964), following written informed consent.

353

### 354 **Reagents and chemicals**

355 All reagents and chemicals were obtained from Sigma or Thermo Fisher Scientific unless  
356 stated otherwise.

357

### 358 ***SOD1*, *FUS*, *TBK1* and *C9orf72* genotyping**

359 *SOD1* and *C9orf72* genotyping were done as described (Keskin et al., 2016). For *FUS*, only  
360 exons 2-6 and 11-15 were analyzed. *TBK1* genotyping was performed as described  
361 (Freischmidt et al., 2015). All individuals tested negative for mutations in a panel of other  
362 ALS-linked genes (details available upon request).

363

### 364 **Derivation of human fibroblasts**

365 Following screening of blood to identify *SOD1*, *FUS*, *TBK1* and *C9orf72* mutation carriers,  
366 fibroblasts were generated from a 3 mm punch skin biopsy (upper arm) from 10 ALS patients  
367 with *SOD1* mutations (A4V, H46R, E78\_R79insSI, N86S, D90A, G93A, L117V,  
368 D125Tfs\*24 and G127Gfs\*7 (G127X – in 2 patients)). One ALS patient with Q23L mutation  
369 in *FUS*, 5 ALS patients with *TBK1* mutations (A417X – in 2 patients, M598V, I450Kfs\*14,  
370 p.690-713del), 1 ALS and 1 FTD patient with massive intronic GGGGCC repeat-expansions  
371 in *C9orf72*, and 4 non-disease control individuals (Table EV1). The establishment of the lines  
372 followed standard procedures (Keskin et al., 2016). ALS patients were diagnosed according to  
373 EFNS guidelines (Andersen et al., 2005). All patients were heterozygous for their  
374 corresponding mutations except the *SOD1*<sup>D90A</sup> patient, who was homozygous. Control  
375 subjects were relatives of ALS patients. All healthy control subjects tested negative (wt/wt)  
376 for a panel of ALS-associated genes including *SOD1*, *C9orf72*, *TBK1* and *UBQLN2*.

377

## 378 **Generation and maintenance of iPSCs**

379 Fibroblast lines were reprogrammed either with the mRNA Reprogramming Kit (Stemgent,  
380 Cambridge, MA, USA) (Warren et al., 2010) using a commercial service (Collectis AB,  
381 Gothenburg, Sweden) or using an episomal vector system (Okita et al., 2011) (Table EV1).  
382 iPSCs were cultured using the DEF-CS culture system (Takara Bio Europe, Gothenburg,  
383 Sweden) seeded at a density of 40,000 cells/cm<sup>2</sup>. Media changes were performed every 24 h  
384 and cells were passaged after 3-4 days at a density of 1.5 - 2x10<sup>5</sup> cells/cm<sup>2</sup> using TrypLE and  
385 plated in DEF media supplemented with GF1, GF2 and GF3 (Takara Bio Europe,  
386 Gothenburg, Sweden).

387

## 388 **Generation of iPSC-MNACs**

389 To generate MNACs, iPSCs at 90% confluence were maintained with N2/B27 media,  
390 consisting of DMEM/F12, Neurobasal, 1x Nonessential Amino Acids (NEAA; Millipore,  
391 Bedford, MA, USA), 2 mM L-glutamine, 1% (v/v) N2 supplement, 2% (v/v) B27 supplement  
392 and penicillin/streptomycin. Over 14 days of differentiation, N2/B27 media were  
393 supplemented with 1 μM all-*trans* retinoic acid (RA) and 1 μM smoothed agonist (SAG;  
394 Millipore, Bedford, MA, USA). For the first 6 days, cells were kept in N2/B27 media,  
395 supplemented with 10 μM SB431542 and 100 nM LDN (Stemgent, Lexington, MA, USA).  
396 Dual SMAD inhibition (SB and LDN) was maintained until day 7, after which cells were  
397 maintained with N2/B27, supplemented with 4 μM SU5402 (Stemgent, Lexington, MA,  
398 USA) and 5 μM DAPT (Selleck Chemicals, Houston, TX, USA) (Lamas et al., 2014).

399 At Day 14, differentiated cells (neurons and astrocytes) were dissociated to single cells  
400 with Accutase and plated onto poly-L-ornithine/laminin-coated 6-well plates (BD  
401 Biosciences, Franklin Lakes, NJ, USA) at a density of 100,000 cells/cm<sup>2</sup> or 13 mm diameter  
402 coverslips (No. 1.5, VWR, Stockholm, Sweden) at 40,000 cells/cm<sup>2</sup>. MNAC cultures were  
403 maintained in MN culture media, consisting of Neurobasal, NEAA, 2 mM L-glutamine, 1%  
404 (v/v) N2 supplement, 2% (v/v) B27 supplement, 0.4 mg/L ascorbic acid 25 μM glutamate, 25  
405 μM 2-mercaptoethanol, 1 μM RA, 20 μM Y-27632 (Abcam, Cambridge, UK) and  
406 penicillin/streptomycin. Cells were incubated in a humidified atmosphere at 37°C  
407 supplemented with 5% (v/v) CO<sub>2</sub> and MNAC cultures. On days 11 - 13 days after plating  
408 (days 24-26 of the differentiation), MNACs were exposed to different O<sub>2</sub> tensions prior to  
409 analysis.

## 410 **Exposure to different oxygen tensions**

411 Fibroblasts were plated at 8000 cells/cm<sup>2</sup> in 60 mm dishes or 6-well plates (BD Biosciences,  
412 Franklin Lakes, NJ, USA) and incubated in an humidified atmosphere at 37°C with 5% (v/v)  
413 CO<sub>2</sub>. After reaching 60-70% confluence, the medium was replaced prior to exposure to  
414 different O<sub>2</sub> tensions. Differentiated MNACs were exposed to different O<sub>2</sub> concentrations  
415 without medium change. For O<sub>2</sub> tensions lower than 19%, cells were incubated in a sealed  
416 chamber (Biospherix, Lacona, NY, USA) gassed with humidified gas mixtures (1 - 10% O<sub>2</sub>,  
417 5% CO<sub>2</sub>, 94 - 85% N<sub>2</sub>) at 37°C. The O<sub>2</sub> concentration was maintained using a ProOx P110  
418 oxygen controller (Biospherix, Lacona, NY, USA) supplied with N<sub>2</sub> gas. For each experiment  
419 cells were also cultured in parallel under humidified atmospheric O<sub>2</sub> (19% O<sub>2</sub>, 5% CO<sub>2</sub>, 76%  
420 N<sub>2</sub>) in a standard tissue culture incubator.

421

## 422 **Generation of patient-derived primary astrocytes**

423 A piece (2 cm) of ventral horn from the thoracic spinal cord was dissected for cell isolation as  
424 previously described (Haidet-Phillips et al., 2011). The tissue was diced and dissociated using  
425 2.5 U/ml papain and 0.5 U/ml Dispase (Stemcell Technology, Canada, Inc.) in 1xHBSS  
426 supplemented with 40 µg/ml DNase at 37°C for 45 min with mixing every 5 min Cells were  
427 dissociated using a P1000 pipette tip and then mixed with KnockOut DMEM/F12 media  
428 containing 10% (v/v) foetal bovine serum (FBS), before filtering the cells through a 0.7 µm  
429 cell strainer followed by centrifugation. The cell pellet was resuspended in DMEM/F12 +  
430 10% FBS and mixed with an equal volume of Percoll (GE healthcare, Chicago, Illinois). The  
431 mixture was centrifuged at 20,000 g for 30 min at 4°C and the flocculent layer above the red  
432 blood cell layer was collected, washed, resuspended and cultured in primary cell media  
433 containing KnockOut DMEM/F12 + 10 % (v/v) FBS supplemented with 20 ng/ml FGF-2, 20  
434 ng/ml EGF, 20 ng/ml PDGF-AB (all from Peprotech, Rocky Hill, NJ), 2 mM GlutaMAX  
435 Supplement, 1x (v/v) StemPro Neural Supplement and penicillin/streptomycin. The cells were  
436 cultured on CELLstart-coated plates and after 24 hours the medium was replaced with serum-  
437 free primary cell media. Every 2 days, half of the medium was replaced until cells reached  
438 80% confluence after 4-5 weeks. The cells were then passaged, expanded and plated either in  
439 coated 6-well plates (BD Biosciences, Franklin Lakes, NJ, USA), for exposure to different O<sub>2</sub>  
440 tensions, or 13 mm coated coverslips (VWR, Stockholm, Sweden) for immunohistochemistry.

441

442

#### 443 **Cell collection and detergent-insoluble aggregates**

444 Cells were washed at room temperature with PBS containing 40 mM iodoacetamide (IAM),  
445 which blocks reduced cysteine residues via alkylation and prevents artificial formation of the  
446 C57-C146 disulfide bond (Zetterstrom et al., 2007). The cells were detached with trypsin, and  
447 then washed with PBS containing 40 mM IAM and 0.5% (v/v) FBS. After centrifugation of  
448 the suspension at 500 g for 5 min, the cell pellet was collected and snap frozen on dry ice and  
449 stored in a -80°C freezer.

450 Cell pellets were lysed in ice-cold PBS containing the Complete EDTA-free protease  
451 inhibitor cocktail (Roche Diagnostics, Mannheim, Germany), 40 mM IAM and 0.5% (v/v)  
452 NP-40 using a Sonifier Cell Disrupter (Branson, Danbury, CT, USA). Lysates were  
453 centrifuged at 20,000 g for 30 min at 4°C and supernatants were collected and analyzed  
454 directly with by misELISA (see below). Pellets were washed twice in ice-cold lysis buffer  
455 containing 0.5% (v/v) NP-40 to remove remaining detergent-soluble proteins. The final  
456 pellets were used for determination of detergent-insoluble SOD1 aggregates by western  
457 blotting.

458

#### 459 **Immunocapture**

460 A rabbit anti-human SOD1 antibody raised against aa 24-39 of SOD1 was cross-linked to  
461 Dynabeads® M-270 Epoxy with the Dynabeads Antibody Coupling Kit (Invitrogen). Beads  
462 were recovered with a magnet, washed with the supplied buffers to remove unbound antibody  
463 and equilibrated with PBS containing the Complete EDTA-free protease inhibitor cocktail  
464 (Roche Diagnostics, Mannheim, Germany), 40 mM IAM and 0.5% (v/v) NP-40. Antibody-  
465 coated beads were incubated with 20,000 g cell lysate supernatants for 1 h at 23°C. Beads  
466 were washed five times with PBS containing the Complete EDTA-free protease inhibitor  
467 cocktail (Roche Diagnostics, Mannheim, Germany), 40 mM IAM and 0.5% (v/v) NP-40 and  
468 samples were eluted by boiling in 1x sample buffer containing 40 mM IAM. A proportion of  
469 the input and non-bound fractions (1/40<sup>th</sup>), as well as the entire immunocaptured fractions,  
470 were analyzed using non-reduced western blotting to determine the proportions of reduced  
471 and oxidized SOD1.

472

#### 473 **Analysis of misfolded and total SOD1 by ELISA**

474 Misfolded SOD1 ELISA (misELISA) was carried out as described (Zetterström et al., 2011,  
475 Zetterström et al., 2013). A primary rabbit antibody was raised against a peptide  
476 corresponding to aa 24-39 of the human SOD1 sequence. This antibody reacts only with  
477 disordered SOD1 species and lacks affinity for the natively folded protein (Bergh et al., 2015,  
478 Forsberg et al., 2011, Forsberg et al., 2010). A goat anti-human SOD1 antibody was used as a  
479 secondary antibody. It was raised against SOD1 that had been denatured by incubation with  
480 guanidinium chloride and EDTA, and reacts preferentially with the disordered protein  
481 (Zetterström et al., 2011). For calibration of the misELISA, a fresh spinal cord from a  
482 transgenic mouse expressing hSOD1<sup>G127X</sup> was homogenized in 25 volumes 10 mM K  
483 phosphate, pH 7.0 in 0.15 M NaCl, containing the Complete protease inhibitor cocktail  
484 (Roche Diagnostics, Mannheim, Germany) and 40 mM IAM. After centrifugation at 20,000 g,  
485 the supernatant was divided into multiple aliquots that were stored at -80°C. One unit of  
486 misfolded SOD1 is defined as the amount present in 1 g wet weight of the original human  
487 SOD1<sup>G127X</sup> standard spinal cord.

488 The misELISA only reacts with disordered/misfolded SOD1 species. There is no response  
489 to holoSOD1 or SOD1s that lack Cu and/or the C57-C146 disulfide bond as long as the  
490 polypeptide is natively folded. The cell extracts were incubated for 1 h at 23°C with the  
491 capture antibody in the misELISAs. This temperature was selected because at 37°C, some  
492 folded SOD1 species have been found to unfold continuously in diluted extracts, such as the  
493 cell extracts analyzed here (Zetterström et al., 2013). Moreover, it has been shown that  
494 mutations can influence the conformations of immature SOD1 states which could affect the  
495 reactivity with the antibodies (Santamaria et al., 2016, Sekhar et al., 2016). Thus, the actual  
496 levels of misfolded SOD1 at physiological temperature are not mirrored equally for the SOD1  
497 variants, and misELISA results are not directly comparable between cell lines expressing  
498 different SOD1s. However, for a given cell line expressing the same SOD1 variant, the effects  
499 of different O<sub>2</sub> tensions on the levels of misfolded SOD1 can be determined.

500 Total SOD1 was quantified in extracts with a sandwich ELISA based on rabbit capture and  
501 goat detection antibodies, both raised against native human SOD1 (Zetterström et al., 2011).  
502 It was standardized against human hemolysate with a known SOD1 content calibrated against  
503 pure human SOD1, the concentration of which was determined by quantitative amino acid  
504 analysis (Marklund et al., 1997).

505

506 **Western blot, quantification of SOD1 protein, and determination of disulfide-reduced**  
507 **SOD1**



508 The total protein content of cell lysates was determined using the BCA Protein Assay Kit.  
509 Western blots were performed in Any kD and 18% (w/v) Criterion TGX precast gels (BioRad  
510 Laboratories, Hercules, CA, USA) as previously described (Keskin et al., 2016).

511 For analysis of SOD1, the primary antibodies used were: rabbit anti-human SOD1  
512 antibodies raised against peptides corresponding to aa 24-39 (2.3 µg/ml), 57-72 (1.6 µg/ml),  
513 aa 144-153 (5.2 µg/ml), aa 123-127GQRWK (4.8 µg/ml, G127X-specific) (Jonsson et al.,  
514 2006). The same human SOD1 standard described above was used for calibration. For  
515 analysis of SOD1<sup>G127X</sup> using the aa 123-127GQRWK antibody, blots were standardized with  
516 an hSOD1<sup>G127X</sup> transgenic mouse extract in which the SOD1<sup>G127X</sup> content was determined by  
517 western blot using the human-specific aa 24-39 antibody. The proportions of disulfide-  
518 reduced and oxidized SOD1 were determined using non-reducing western blotting, i.e.  
519 omitting reductant and adding 40 mM IAM to the sample buffer as described (Jonsson et al.,  
520 2006, Zetterström et al., 2013, Zetterstrom et al., 2007).

521 Other antibodies used were rabbit anti-CCS raised against peptides corresponding to aa  
522 252-270 of the human CCS sequence (CCS, 0.9 µg/ml) (Jonsson et al., 2006), rabbit anti-  
523 CCS (1:1000 Santa Cruz Biotechnology, Dallas, TX, USA), rabbit anti-glutaredoxin-1 (1:250,  
524 Abcam, Cambridge, UK), mouse anti-β-actin (1:200,000; Millipore, Bedford, MA, USA) and  
525 rabbit anti-GAPDH (1:1000, Abcam, Cambridge, UK). Secondary antibodies used were  
526 horseradish peroxidase (HRP)-conjugated polyclonal anti-mouse or anti-rabbit IgG (1:10,000,  
527 Dako, Glostrup, Denmark). ECL Select reagent (GE Healthcare Biosciences, Piscataway, NJ,  
528 USA) was used to detect the signal, which was recorded on a ChemiDoc Touch apparatus  
529 (BioRad Laboratories, Hercules, CA, USA) and analyzed using ImageLab software (BioRad  
530 Laboratories, Hercules, CA, USA).

531

### 532 **Effect of cycloheximide on SOD1 misfolding**

533 Fibroblasts were exposed to 19% O<sub>2</sub> or 1% O<sub>2</sub> as described above in the presence and absence  
534 of protein synthesis inhibitor CHX (50 µg/ml) for 24 h prior to harvest.

535

### 536 **Analysis of reduced and oxidized glutathione**

537 After exposure of MNACs and fibroblasts to different O<sub>2</sub> tensions (1-2-19% O<sub>2</sub>) for 24 h as  
538 described above, media was aspirated rapidly and 300 µL of ice-cold extraction mixture (0.25  
539 µM glutathione-(glycine-<sup>13</sup>C<sub>2</sub>, <sup>15</sup>N; GSH-IS), 2.5% metaphosphoric acid, 1 mM EDTA and

540 0.1% formic acid) were added immediately to the cells. After scraping, the resulting cell  
541 suspensions were snap-frozen and stored at -80°C until analysis.

542 For analysis, a tungsten bead was added to the tubes, which were then homogenized in a  
543 bead mill (Retsch MM400) at 30 oscillations/s for 1 min, followed by centrifugation at 22,000  
544 g for 20 min. Fifty  $\mu$ L of the resulting supernatant was transferred to a LC-MS vial and 1  $\mu$ L  
545 was injected and analyzed by LC-ESI-MSMS (1290 Infinity system from Agilent  
546 Technologies, with an Acquity UPLC HSS T3 column, thermostatted to 40°C and coupled to  
547 an Agilent 6490 Triple quadrupole mass spectrometer). The analysis was performed as  
548 essentially as described (Cao et al., 2013) by comparison to GSH and GSSG solutions made  
549 in water (2.5 mM metaphosphoric acid, 1 mM EDTA, 0.1% formic acid) at twelve different  
550 calibration concentrations (0.01-10  $\mu$ M) and containing the GSH-IS.

551 GSH and GSSG concentrations were normalized to the protein content of the  
552 corresponding 22,000 g pellets after extraction. Pellets were resuspended by  
553 sonication/boiling in sample buffer. Protein estimation was performed using the BCA Protein  
554 Assay Kit and bovine serum albumin standards boiled in 1x sample buffer.

555

## 556 **Immunocytochemistry**

557 Cells were fixed in 3.8% (w/v) formaldehyde for 10 min at room temperature, and blocked  
558 with 10% (v/v) FBS in PBS containing 0.1% (v/v) Triton X-100 for 1 h at room temperature.  
559 Cells were incubated with primary antibodies overnight at 4°C. The primary antibodies used  
560 were; anti-neuron-specific class III beta-tubulin (TUBB3, TUJ1, 1:7500, Covance Inc.  
561 Princeton, NJ, USA), microtubule-associated protein 2 (MAP2; 1:500, Millipore, Bedford,  
562 MA, USA), SMI32 (1:1000, Covance Inc. Princeton, NJ, USA), ISL1/2 (39.4D5, 1:5,  
563 developed by T.M. Jessell and S. Brenner-Morton, Developmental Studies Hybridoma Bank,  
564 created by the NICHD of the NIH and maintained at The University of Iowa, Department of  
565 Biology, Iowa City, IA, USA), S100 $\beta$  (1:200) and vimentin (1:1000 Progen, Heidelberg,  
566 Germany). Next day, the coverslips were washed and incubated with Alexa-Fluor conjugated  
567 secondary antibodies (1:1000) for 1 h at room temperature, and nuclei were counterstained  
568 with 4',6-diamidino-2-phenylindole (DAPI; 0.3  $\mu$ M). Cells were mounted in Aqua-Polymount  
569 (Polysciences, Inc., Warrington, PA, USA).

570

571

572

### 573 **In vitro cell cytotoxicity assays**

574 Dead cells that had lost plasma membrane integrity were quantified using the luminogenic  
575 substrate AAF-Glo (CytoTox-Glo Cell Viability Assay, Promega, Madison, WI, USA) as  
576 previously described (Keskin et al., 2016). Cell viability was calculated by subtracting the  
577 luminescence signal obtained before, from the total luminescence values obtained after,  
578 permeabilization with digitonin according to the manufacturer's protocol.

579 Cellular ATP content was determined using the CellTiter-Glo Luminescent Cell Viability  
580 Assay (Promega, Madison, WI, USA).

581

### 582 **Proteasome activity assay**

583 A cell-based luminescent proteasome assay (Proteasome-Glo, Promega, Madison, WI, USA)  
584 was used to measure chymotrypsin-like proteasome activity as described (Keskin et al., 2016).  
585 The assay contains the luminogenic peptide substrate Suc-LLVY-aminoluciferin for  
586 determination of chymotrypsin-like activity of the proteasome.

587

### 588 **Statistical analyses**

589 Statistical analyses were performed using GraphPad Prism version 6.00 (La Jolla, CA, USA).  
590 To test for statistical significance between two groups, the Mann-Whitney U test was  
591 used. For statistical significance testing between multiple groups, the Kruskal-Wallis test  
592 followed by Dunn's post hoc test was used. The significance level was set to 0.05. All values  
593 are given as means  $\pm$  SD.

594

### 595 **Acknowledgements**

596 We thank the many individuals that generously provided patient or control samples. We thank  
597 Anna Wuolikainen for valuable discussions and Agneta Öberg, Eva Jonsson, Eva Bern, and  
598 Matthew Marklund for skillful technical assistance. The study was supported by the Swedish  
599 Research Council (VRMH 2015-02804), the Knut and Alice Wallenberg Foundation  
600 (2012.0091), the Bertil Hållsten Foundation, the Torsten Söderberg Foundation, the Swedish  
601 Brain Fund (Hjärnfonden FO2015-0234), the Ulla-Carin Lindquist Foundation,  
602 Neuroförbundet, the Stratneuro Initiative, Västerbotten County Council, and the Kempe  
603 Foundations. MS was supported by the Else Kröner Fresenius Stiftung.

604

605 **Author contributions**

606 Conception and design of the work: IK, EF, ML, UN, PMA, PZ, SLM, JDG. Clinical and  
607 pathological diagnoses and sample collection: DJL, MS, TB, PMA. Acquisition, analysis, or  
608 interpretation of the data: IK, EF, ML, PMA, TB, UN, PZ, SLM, JDG. Drafting or revising  
609 the manuscript for intellectual content: IK, EF, ML, UN, PMA, SLM, JDG with input from all  
610 authors. Final approval of the manuscript: All authors.

611

612 **Conflict of interest**

613 The authors declare that they have no conflict of interest.

614

615

616

617

618

619

620

621

622

623

624

625

626

627

628

629

630

631

632

633

634

635 **Figure legends**

636

637 **Figure 1. Experimental overview and generation of mixed motor neuron and astrocyte**  
638 **cultures (MNACs) derived from induced pluripotent stem cells (iPSCs).**

639 (A) Patient-derived fibroblasts, primary spinal cord ventral horn astrocytes and iPSC-derived  
640 MNACs were exposed to different O<sub>2</sub> tensions for 24 h prior to analysis. (B) Patient-derived  
641 fibroblasts were reprogrammed to iPSCs using the 4 Yamanaka factors and then differentiated  
642 to a forelimb level, ventral spinal cord identity over 14 days. At Day 14, differentiated cells  
643 were dissociated and plated on poly-L-ornithine/laminin and matured for 10 more days.  
644 MNACs were used for O<sub>2</sub> tension experiments at Day 25.

645

646 **Figure 2. Concentration- and time-dependent misfolding of SOD1 in response to low**  
647 **oxygen tensions.**

648 Misfolded SOD1 quantified in fibroblast extracts by misELISA, normalized to total protein  
649 and presented as a ratio to the level present in replicate cultures maintained at 19% O<sub>2</sub> for 24  
650 h. (A) O<sub>2</sub> concentration- (19-1%) and (B) time- (1-24 h) dependent increases in misfolded  
651 SOD1 in fibroblast lines. Data are expressed as the mean ± SD (n = 3 replicate culture wells).  
652 (C) Reversal of the misfolding response following transfer of cultures from 1% O<sub>2</sub>/24 h to  
653 19% O<sub>2</sub>. Data are expressed as the mean ± SD (n = 3 replicate culture wells for Control and  
654 SOD1<sup>G127X</sup>, 2 replicate experiments each with 3 replicate cultures for G93A), \**p* < 0.05  
655 analyzed by the Kruskal-Wallis test followed by Dunn's test. (D) Misfolding response in  
656 patient-derived fibroblast lines and (E) primary astrocytes following exposure to 1% O<sub>2</sub> for 24  
657 h. Data are expressed as the mean ± SD (n = 3 to 15; 1-5 replicate experiments each with 3  
658 replicate cultures), \**p* < 0.05, \*\**p* < 0.01, \*\*\*\**p* < 0.0001 analyzed by Mann-Whitney U test.  
659 Blue bars = fibroblasts, green bars = astrocytes, grey bars = corresponding cell lines cultured  
660 at 19% O<sub>2</sub>.

661

662 **Figure 3. Enhanced misfolding response in patient-derived MNACs.**

663 Misfolded SOD1 quantified in MNAC extracts by misELISA, normalized to total protein and  
664 presented as a ratio to the level present in replicate cultures maintained at 19% O<sub>2</sub> for 24 h.  
665 (A) O<sub>2</sub> tension (19-2%) dependent increases in misfolded SOD1. Data are expressed as the  
666 mean ± SD (n = 6; 2 replicate experiments from independent differentiations, each with 3  
667 replicate cultures), \**p* < 0.05, \*\**p* < 0.01, \*\*\*\**p* < 0.0001, analyzed by Kruskal-Wallis test

668 followed by Dunn's test. (B) SOD1 misfolding is increased in MNACs following exposure to  
669 2% O<sub>2</sub> for 24 h. Data are expressed as the mean ± SD (n = 6 to 18; 2-6 replicate experiments  
670 from independent differentiations, each with 3 replicate cultures), \**p* < 0.05, \*\**p* < 0.01,  
671 \*\*\*\**p* < 0.0001, analyzed by Mann-Whitney U test.

672

673 **Figure 4. Low O<sub>2</sub> tension promotes disulfide bond reduction and misfolding of SOD1.**

674 Analysis of MNAC extracts following exposure to 19% or 2% O<sub>2</sub> for 24 h. (A) Disulfide-  
675 reduced (red) and -oxidized (ox) SOD1 were resolved by non-reducing SDS-PAGE followed  
676 by western blotting with an anti-SOD1 24-39 aa antibody. (B) Scatter plot showing the ratios  
677 of disulfide-reduced to -oxidized SOD1 at 19% (grey circles) O<sub>2</sub> versus 2% (red circles). Data  
678 are expressed as the mean ± SD (n = 4 to 8; 2-6 replicate experiments from independent  
679 differentiations, each with 3 replicate cultures), \**p* < 0.05, \*\**p* < 0.01, \*\*\**p* < 0.001, analyzed  
680 by the Mann-Whitney U test to compare to the respective line cultured at 19% O<sub>2</sub> for 24 h.  
681 (C) Western blot showing analysis of immunocaptured misfolded SOD1. Input (I, 1/40<sup>th</sup> of  
682 the sample), non-bound (NB, 1/40<sup>th</sup>) and immunocaptured (IC, entire sample) fractions of  
683 SOD1 from MNACs cultured at 19% O<sub>2</sub> or 2% O<sub>2</sub> for 24 h using anti-SOD1 24-39 aa.  
684 Disulfide-reduced and -oxidized SOD1 were quantified using anti-SOD1 aa 57-72. Only  
685 disulfide-reduced SOD1 was captured.

686

687 **Figure 5. Low O<sub>2</sub> tension does not alter known determinants of SOD1 C57-C146 redox**  
688 **status.**

689 (A) CCS and (B) glutaredoxin-1 quantified in MNAC extracts by western blotting and  
690 normalized to β-actin as a loading control. Cells exposed to 19% O<sub>2</sub> (grey bars) or 2% O<sub>2</sub> (red  
691 bars) for 24 h. Plotted as a ratio of the level present in replicate cultures maintained at 19% O<sub>2</sub>  
692 for 24 h. Data are expressed as the mean ± SD (n = 4 to 10; 2-6 replicate experiments from  
693 independent differentiations, each with 3 replicate cultures), analyzed by Mann-Whitney U  
694 test. (C) GSH levels, (D) GSSG levels and (E) GSH/GSSG ratios determined in MNACs (left,  
695 red bars) and fibroblasts (right, blue bars). Data are expressed as the mean ± SD (n = 6; 2  
696 replicate experiments from independent differentiations, each with 3 replicates for MNACs)  
697 and (n = 3 replicate cultures of fibroblasts), \**p* < 0.05, analyzed by the Mann-Whitney U test  
698 to compare to the respective line cultured at 19% O<sub>2</sub> for 24 h.

699

700 **Figure 6. Low O<sub>2</sub> tension increases disulfide bond reduction in both nascent and**  
701 **mature SOD1.**

702 Misfolded SOD1 quantified in; (A) Control I, (B) SOD1<sup>G127X</sup> and (C) SOD1<sup>G93A</sup> fibroblast  
703 extracts by misELISA, normalized to total protein. Cells grown at 19% O<sub>2</sub> (grey bars) or 1%  
704 O<sub>2</sub> (blue bars) for 24 h in the absence, or presence (checker board pattern), of cycloheximide  
705 (CHX; 50 µg/ml). Data are expressed as the mean ± SD (n = 3 replicate cultures for Control I  
706 and SOD1<sup>G127X</sup>) and (n = 6; 2 replicate experiments each with 3 replicate cultures for  
707 SOD1<sup>G93A</sup> normalized by division by the means of each experiment), \*\**p* < 0.01, analyzed by  
708 the Mann-Whitney U-test.

710 **Figure 7. Low O<sub>2</sub> tension promotes SOD1 aggregation in MNACs but not in**  
711 **fibroblasts.**

712 Scatter plots show the amounts of SOD1 present in the detergent-insoluble fraction  
713 determined by western blotting as a % of soluble SOD1 present in the cell extract determined  
714 by ELISA; MNACs (red; 2% O<sub>2</sub>/24 h) and fibroblasts (blue; 1% O<sub>2</sub>/24 h) in comparison to  
715 replicate cultures (grey; 19% O<sub>2</sub>/24 h). Full-length SOD1s are depicted as filled circles. The  
716 aa 57-72 antibody used for detection showed relatively strong bands in the SOD1<sup>D125Tfs\*24</sup>  
717 samples (Fig EV6A). This represents mutant SOD1 (filled squares), since negligible bands  
718 were detected using an antibody raised against a C-terminal SOD1 (aa 143-153) peptide (Fig  
719 EV6E). The SOD1<sup>G127X</sup> mutant protein (filled triangles) was quantified using a hSOD1<sup>G127X</sup>-  
720 specific antibody (Fig EV6 B and D). Data are expressed as the means ± SD (n = 4 to 10; 2-6  
721 replicate experiments from independent differentiations, each with 3 replicates for MNACs)  
722 and (n = 3 to 6; 1-3 experiments each with 3 replicates for fibroblasts), \**p* < 0.05, \*\**p* < 0.01,  
723 \*\*\**p* < 0.001, analyzed by the Mann-Whitney U test.

724

725

726

727

728

729

730

731

732 **References**

- 733 Alavi A, Nafissi S, Rohani M, Zamani B, Sedighi B, Shamshiri H, Fan JB, Ronaghi M, Elahi E (2013)  
734 Genetic analysis and SOD1 mutation screening in Iranian amyotrophic lateral sclerosis patients.  
735 *Neurobiology of aging* 34: 1516 e1-8
- 736 Amoroso MW, Croft GF, Williams DJ, O'Keefe S, Carrasco MA, Davis AR, Roybon L, Oakley DH,  
737 Maniatis T, Henderson CE, Wichterle H (2013) Accelerated high-yield generation of limb-  
738 innervating motor neurons from human stem cells. *The Journal of neuroscience : the official*  
739 *journal of the Society for Neuroscience* 33: 574-86
- 740 Andersen PM, Al-Chalabi A (2011) Clinical genetics of amyotrophic lateral sclerosis: what do we  
741 really know? *Nature reviews Neurology* 7: 603-15
- 742 Andersen PM, Borasio GD, Dengler R, Hardiman O, Kollewe K, Leigh PN, Pradat PF, Silani V,  
743 Tomik B (2005) EFNS task force on management of amyotrophic lateral sclerosis: guidelines for  
744 diagnosing and clinical care of patients and relatives. *European journal of neurology : the official*  
745 *journal of the European Federation of Neurological Societies* 12: 921-38
- 746 Andersen PM, Forsgren L, Binzer M, Nilsson P, Ala-Hurula V, Keranen ML, Bergmark L, Saarinen  
747 A, Haltia T, Tarvainen I, Kinnunen E, Udd B, Marklund SL (1996) Autosomal recessive adult-  
748 onset amyotrophic lateral sclerosis associated with homozygosity for Asp90Ala CuZn-superoxide  
749 dismutase mutation. A clinical and genealogical study of 36 patients. *Brain : a journal of neurology*  
750 119 ( Pt 4): 1153-72
- 751 Andersen PM, Nilsson P, Ala-Hurula V, Keränen ML, Tarvainen I, Haltia T, Nilsson L, Binzer M,  
752 Forsgren L, Marklund SL (1995) Amyotrophic lateral sclerosis associated with homozygosity for  
753 an Asp90Ala mutation in CuZn-superoxide dismutase. *Nat Genet* 10: 61-6
- 754 Ayers JI, Fromholt S, Koch M, DeBosier A, McMahon B, Xu G, Borchelt DR (2014) Experimental  
755 transmissibility of mutant SOD1 motor neuron disease. *Acta Neuropathol* 128: 791-803
- 756 Ayers JI, Fromholt SE, O'Neal VM, Diamond JH, Borchelt DR (2016) Prion-like propagation of  
757 mutant SOD1 misfolding and motor neuron disease spread along neuroanatomical pathways. *Acta*  
758 *Neuropathol* 131: 103-14
- 759 Bergemalm D, Forsberg K, Srivastava V, Graffmo KS, Andersen PM, Brannstrom T, Wingsle G,  
760 Marklund SL (2010) Superoxide dismutase-1 and other proteins in inclusions from transgenic  
761 amyotrophic lateral sclerosis model mice. *J Neurochem* 114: 408-18
- 762 Bergh J, Zetterström P, Andersen PM, Brännström T, Graffmo KS, Jonsson PA, Lang L, Danielsson J,  
763 Oliveberg M, Marklund SL (2015) Structural and kinetic analysis of protein-aggregate strains in  
764 vivo using binary epitope mapping. *Proc Natl Acad Sci U S A* 112: 4489-94
- 765 Bidhendi EE, Bergh J, Zetterstrom P, Andersen PM, Marklund SL, Brannstrom T (2016) Two  
766 superoxide dismutase prion strains transmit amyotrophic lateral sclerosis-like disease. *J Clin Invest*  
767 126: 2249-53
- 768 Birve A, Neuwirth C, Weber M, Marklund SL, Nilsson AC, Jonsson PA, Andersen PM (2010) A  
769 novel SOD1 splice site mutation associated with familial ALS revealed by SOD activity analysis.  
770 *Human molecular genetics* 19: 4201-6
- 771 Bordo D, Djinovic K, Bolognesi M (1994) Conserved patterns in the Cu,Zn superoxide dismutase  
772 family. *Journal of molecular biology* 238: 366-86
- 773 Bosco DA, Morfini G, Karabacak NM, Song Y, Gros-Louis F, Pasinelli P, Goolsby H, Fontaine BA,  
774 Lemay N, McKenna-Yasek D, Frosch MP, Agar JN, Julien JP, Brady ST, Brown RH, Jr. (2010)  
775 Wild-type and mutant SOD1 share an aberrant conformation and a common pathogenic pathway in  
776 ALS. *Nat Neurosci* 13: 1396-403
- 777 Boukaftane Y, Khoris J, Moulard B, Salachas F, Meininger V, Malafosse A, Camu W, Rouleau GA  
778 (1998) Identification of six novel SOD1 gene mutations in familial amyotrophic lateral sclerosis.  
779 *Can J Neurol Sci* 25: 192-6
- 780 Cao L, Waldon D, Teffera Y, Roberts J, Wells M, Langley M, Zhao Z (2013) Ratios of biliary  
781 glutathione disulfide (GSSG) to glutathione (GSH): a potential index to screen drug-induced  
782 hepatic oxidative stress in rats and mice. *Anal Bioanal Chem* 405: 2635-42
- 783 Carroll MC, Outten CE, Proescher JB, Rosenfeld L, Watson WH, Whitson LJ, Hart PJ, Jensen LT,  
784 Cizewski Culotta V (2006) The effects of glutaredoxin and copper activation pathways on the  
785 disulfide and stability of Cu,Zn superoxide dismutase. *The Journal of biological chemistry* 281:  
786 28648-56



- 787 Charcot JM (1873) Lecons sur les maladies du système nerveux. 2nd series, collected by Bourneville.  
788 Charcot, J.M. (1881) Lectures on the diseases of the nervous system, Vol 2, series 2, Sigersen G  
789 (trans and ed). London: New Sydenham Society, 163-204.
- 790 Chattopadhyay M, Durazo A, Sohn SH, Strong CD, Gralla EB, Whitelegge JP, Valentine JS (2008)  
791 Initiation and elongation in fibrillation of ALS-linked superoxide dismutase. *Proc Natl Acad Sci U*  
792 *S A* 105: 18663-8
- 793 Chattopadhyay M, Nwadibia E, Strong CD, Gralla EB, Valentine JS, Whitelegge JP (2015) The  
794 Disulfide Bond, but Not Zinc or Dimerization, Controls Initiation and Seeded Growth in  
795 Amyotrophic Lateral Sclerosis-linked Cu,Zn Superoxide Dismutase (SOD1) Fibrillation. *The*  
796 *Journal of biological chemistry* 290: 30624-36
- 797 Chio A, Benzi G, Dossena M, Mutani R, Mora G (2005) Severely increased risk of amyotrophic  
798 lateral sclerosis among Italian professional football players. *Brain : a journal of neurology* 128:  
799 472-6
- 800 Culotta VC, Klomp LW, Strain J, Casareno RL, Krems B, Gitlin JD (1997) The copper chaperone for  
801 superoxide dismutase. *J Biol Chem* 272: 23469-72
- 802 Da Cruz S, Bui A, Saberi S, Lee SK, Stauffer J, McAlonis-Downes M, Schulte D, Pizzo DP, Parone  
803 PA, Cleveland DW, Ravits J (2017) Misfolded SOD1 is not a primary component of sporadic ALS.  
804 *Acta neuropathologica* 134: 97-111
- 805 Deng HX, Shi Y, Furukawa Y, Zhai H, Fu R, Liu E, Gorrie GH, Khan MS, Hung WY, Bigio EH,  
806 Lukas T, Dal Canto MC, O'Halloran TV, Siddique T (2006) Conversion to the amyotrophic lateral  
807 sclerosis phenotype is associated with intermolecular linked insoluble aggregates of SOD1 in  
808 mitochondria. *Proceedings of the National Academy of Sciences of the United States of America*  
809 103: 7142-7
- 810 Erecinska M, Silver IA (2001) Tissue oxygen tension and brain sensitivity to hypoxia. *Respiration*  
811 *physiology* 128: 263-76
- 812 Fetherolf MM, Boyd SD, Taylor AB, Kim HJ, Wohlschlegel JA, Blackburn NJ, Hart PJ, Winge DR,  
813 Winkler DD (2017) Copper-zinc superoxide dismutase is activated through a sulfenic acid  
814 intermediate at a copper-ion entry site. *The Journal of biological chemistry*
- 815 Forsberg K, Andersen PM, Marklund SL, Brännström T (2011) Glial nuclear aggregates of superoxide  
816 dismutase-1 are regularly present in patients with amyotrophic lateral sclerosis. *Acta Neuropathol*  
817 121: 623-34
- 818 Forsberg K, Jonsson PA, Andersen PM, Bergemalm D, Graffmo KS, Hultdin M, Jacobsson J,  
819 Rosquist R, Marklund SL, Brännström T (2010) Novel antibodies reveal inclusions containing non-  
820 native SOD1 in sporadic ALS patients. *PLoS One* 5: e11552
- 821 Forsgren E, Lehmann M, Mathis MW, Keskin I, Zetterström P, Nijssen J, Lowry ER, Garcia A,  
822 Sandoe J, Hedlund E, Wichterle H, Henderson C, Eggan K, Kiskinis E, Andersen PM, Marklund  
823 SL, Gilthorpe JD (under revision) Enhanced protein misfolding in patient-derived models of  
824 amyotrophic lateral sclerosis. *Stem Cell Reports*
- 825 Freischmidt A, Wieland T, Richter B, Ruf W, Schaeffer V, Muller K, Marroquin N, Nordin F, Hubers  
826 A, Weydt P, Pinto S, Press R, Millecamps S, Molko N, Bernard E, Desnuelle C, Soriani MH, Dorst  
827 J, Graf E, Nordstrom U et al. (2015) Haploinsufficiency of TBK1 causes familial ALS and fronto-  
828 temporal dementia. *Nature neuroscience* 18: 631-6
- 829 Furukawa Y, Kaneko K, Yamanaka K, O'Halloran TV, Nukina N (2008) Complete loss of post-  
830 translational modifications triggers fibrillar aggregation of SOD1 in the familial form of  
831 amyotrophic lateral sclerosis. *J Biol Chem* 283: 24167-76
- 832 Furukawa Y, Torres AS, O'Halloran TV (2004) Oxygen-induced maturation of SOD1: a key role for  
833 disulfide formation by the copper chaperone CCS. *EMBO J* 23: 2872-81
- 834 Gallo V, Bueno-De-Mesquita HB, Vermeulen R, Andersen PM, Kyrozis A, Linseisen J, Kaaks R,  
835 Allen NE, Roddam AW, Boshuizen HC, Peeters PH, Palli D, Mattiello A, Sieri S, Tumino R,  
836 Jimenez-Martin JM, Diaz MJ, Suarez LR, Trichopoulou A, Agudo A et al. (2009) Smoking and  
837 risk for amyotrophic lateral sclerosis: analysis of the EPIC cohort. *Annals of neurology* 65: 378-85
- 838 Gallo V, Vanacore N, Bueno-de-Mesquita HB, Vermeulen R, Brayne C, Pearce N, Wark PA, Ward  
839 HA, Ferrari P, Jenab M, Andersen PM, Wennberg P, Wareham N, Katzke V, Kaaks R, Weiderpass  
840 E, Peeters PH, Mattiello A, Pala V, Barricante A et al. (2016) Physical activity and risk of

- 841 Amyotrophic Lateral Sclerosis in a prospective cohort study. *European journal of epidemiology* 31:  
842 255-66
- 843 Graffmo KS, Forsberg K, Bergh J, Birve A, Zetterstrom P, Andersen PM, Marklund SL, Brannstrom T  
844 (2013) Expression of wild-type human superoxide dismutase-1 in mice causes amyotrophic lateral  
845 sclerosis. *Hum Mol Genet* 22: 51-60
- 846 Haidet-Phillips AM, Hester ME, Miranda CJ, Meyer K, Braun L, Frakes A, Song S, Likhite S, Murtha  
847 MJ, Foust KD, Rao M, Eagle A, Kammesheidt A, Christensen A, Mendell JR, Burghes AHM,  
848 Kaspar BK (2011) Astrocytes from familial and sporadic ALS patients are toxic to motor neurons.  
849 *Nat Biotechnol* 29: 824-8
- 850 Hayward C, Brock DJ, Minns RA, Swingler RJ (1998) Homozygosity for Asn86Ser mutation in the  
851 CuZn-superoxide dismutase gene produces a severe clinical phenotype in a juvenile onset case of  
852 familial amyotrophic lateral sclerosis. *Journal of medical genetics* 35: 174
- 853 Iadecola C (2017) The Neurovascular Unit Coming of Age: A Journey through Neurovascular  
854 Coupling in Health and Disease. *Neuron* 96: 17-42
- 855 Jaarsma D, Haasdijk ED, Grashorn JA, Hawkins R, van Duijn W, Verspaget HW, London J, Holstege  
856 JC (2000) Human Cu/Zn superoxide dismutase (SOD1) overexpression in mice causes  
857 mitochondrial vacuolization, axonal degeneration, and premature motoneuron death and accelerates  
858 motoneuron disease in mice expressing a familial amyotrophic lateral sclerosis mutant SOD1.  
859 *Neurobiology of disease* 7: 623-43
- 860 Jonsson PA, Ernhill K, Andersen PM, Bergemalm D, Brännström T, Gredal O, Nilsson P, Marklund  
861 SL (2004) Minute quantities of misfolded mutant superoxide dismutase-1 cause amyotrophic  
862 lateral sclerosis. *Brain* 127: 73-88
- 863 Jonsson PA, Graffmo KS, Andersen PM, Brännström T, Lindberg M, Oliveberg M, Marklund SL  
864 (2006) Disulphide-reduced superoxide dismutase-1 in CNS of transgenic amyotrophic lateral  
865 sclerosis models. *Brain* 129: 451-64
- 866 Karch CM, Prudencio M, Winkler DD, Hart PJ, Borchelt DR (2009) Role of mutant SOD1 disulfide  
867 oxidation and aggregation in the pathogenesis of familial ALS. *Proc Natl Acad Sci U S A* 106:  
868 7774-9
- 869 Kato M, Aoki M, Ohta M, Nagai M, Ishizaki F, Nakamura S, Itoyama Y (2001) Marked reduction of  
870 the Cu/Zn superoxide dismutase polypeptide in a case of familial amyotrophic lateral sclerosis with  
871 the homozygous mutation. *Neurosci Lett* 312: 165-8
- 872 Kato S, Takikawa M, Nakashima K, Hirano A, Cleveland DW, Kusaka H, Shibata N, Kato M, Nakano  
873 I, Ohama E (2000) New consensus research on neuropathological aspects of familial amyotrophic  
874 lateral sclerosis with superoxide dismutase 1 (SOD1) gene mutations: inclusions containing SOD1  
875 in neurons and astrocytes. *Amyotroph Lateral Scler Other Motor Neuron Disord* 1: 163-84
- 876 Keskin I, Birve A, Berdyski M, Hjertkvist K, Rofougaran R, Nilsson TK, Glass JD, Marklund SL,  
877 Andersen PM (2017) Comprehensive analysis to explain reduced or increased SOD1 enzymatic  
878 activity in ALS patients and their relatives. *Amyotrophic lateral sclerosis & frontotemporal  
879 degeneration* 18: 457-463
- 880 Keskin I, Forsgren E, Lange DJ, Weber M, Birve A, Synofzik M, Gilthorpe JD, Andersen PM,  
881 Marklund SL (2016) Effects of Cellular Pathway Disturbances on Misfolded Superoxide  
882 Dismutase-1 in Fibroblasts Derived from ALS Patients. *PLoS One* 11: e0150133
- 883 Lamas NJ, Johnson-Kerner B, Roybon L, Kim YA, Garcia-Diaz A, Wichterle H, Henderson CE  
884 (2014) Neurotrophic requirements of human motor neurons defined using amplified and purified  
885 stem cell-derived cultures. *PLoS One* 9: e110324
- 886 Lang L, Kurnik M, Danielsson J, Oliveberg M (2012) Fibrillation precursor of superoxide dismutase 1  
887 revealed by gradual tuning of the protein-folding equilibrium. *Proc Natl Acad Sci U S A* 109:  
888 17868-73
- 889 Lyons DG, Parpaleix A, Roche M, Charpak S (2016) Mapping oxygen concentration in the awake  
890 mouse brain. *eLife* 5
- 891 Marklund SL, Andersen PM, Forsgren L, Nilsson P, Ohlsson PI, Wikander G, Oberg A (1997) Normal  
892 binding and reactivity of copper in mutant superoxide dismutase isolated from amyotrophic lateral  
893 sclerosis patients. *J Neurochem* 69: 675-81
- 894 Mercatelli E, Barbieri L, Luchinat E, Banci L (2016) Direct structural evidence of protein redox  
895 regulation obtained by in-cell NMR. *Biochimica et biophysica acta* 1863: 198-204

- 896 Miller AF (2012) Superoxide dismutases: ancient enzymes and new insights. *FEBS letters* 586: 585-95
- 897 Okita K, Matsumura Y, Sato Y, Okada A, Morizane A, Okamoto S, Hong H, Nakagawa M, Tanabe K,
- 898 Tezuka K, Shibata T, Kunisada T, Takahashi M, Takahashi J, Saji H, Yamanaka S (2011) A more
- 899 efficient method to generate integration-free human iPS cells. *Nature methods* 8: 409-12
- 900 Pettersen EO, Larsen LH, Ramsing NB, Ebbesen P (2005) Pericellular oxygen depletion during
- 901 ordinary tissue culturing, measured with oxygen microsensors. *Cell proliferation* 38: 257-67
- 902 Pokrishevsky E, Grad LI, Yousefi M, Wang J, Mackenzie IR, Cashman NR (2012) Aberrant
- 903 localization of FUS and TDP43 is associated with misfolding of SOD1 in amyotrophic lateral
- 904 sclerosis. *PloS one* 7: e35050
- 905 Prudencio M, Durazo A, Whitelegge JP, Borchelt DR (2010) An examination of wild-type SOD1 in
- 906 modulating the toxicity and aggregation of ALS-associated mutant SOD1. *Human molecular*
- 907 *genetics* 19: 4774-89
- 908 Prudencio M, Hart PJ, Borchelt DR, Andersen PM (2009) Variation in aggregation propensities
- 909 among ALS-associated variants of SOD1: correlation to human disease. *Hum Mol Genet* 18: 3217-
- 910 26
- 911 Rosen DR, Siddique T, Patterson D, Figlewicz DA, Sapp P, Hentati A, Donaldson D, Goto J, O'Regan
- 912 JP, Deng HX, et al. (1993) Mutations in Cu/Zn superoxide dismutase gene are associated with
- 913 familial amyotrophic lateral sclerosis. *Nature* 362: 59-62
- 914 Rosenbohm A, Kassubek J, Weydt P, Marroquin N, Volk AE, Kubisch C, Huppertz HJ, Weber M,
- 915 Andersen PM, Weishaupt JH, Ludolph AC, Group ALSSR (2014) Can lesions to the motor cortex
- 916 induce amyotrophic lateral sclerosis? *Journal of neurology* 261: 283-90
- 917 Santamaria N, Alhothali M, Alfonso MH, Breydo L, Uversky VN (2016) Intrinsic disorder in proteins
- 918 involved in amyotrophic lateral sclerosis. *Cell Mol Life Sci*
- 919 Sato T, Nakanishi T, Yamamoto Y, Andersen PM, Ogawa Y, Fukada K, Zhou Z, Aoike F, Sugai F,
- 920 Nagano S, Hirata S, Ogawa M, Nakano R, Ohi T, Kato T, Nakagawa M, Hamasaki T, Shimizu A,
- 921 Sakoda S (2005) Rapid disease progression correlates with instability of mutant SOD1 in familial
- 922 ALS. *Neurology* 65: 1954-7
- 923 Schwarzlander M, Dick TP, Meyer AJ, Morgan B (2016) Dissecting Redox Biology Using
- 924 Fluorescent Protein Sensors. *Antioxidants & redox signaling* 24: 680-712
- 925 Sekhar A, Rumfeldt JA, Broom HR, Doyle CM, Sobering RE, Meiering EM, Kay LE (2016) Probing
- 926 the free energy landscapes of ALS disease mutants of SOD1 by NMR spectroscopy. *Proc Natl*
- 927 *Acad Sci U S A*
- 928 Synofzik M, Ronchi D, Keskin I, Basak AN, Wilhelm C, Gobbi C, Birve A, Biskup S, Zecca C,
- 929 Fernández-Santiago R, Kaugesaar T, Schöls L, Marklund SL, Andersen PM (2012) Mutant
- 930 superoxide dismutase-1 indistinguishable from wild-type causes ALS. *Hum Mol Genet* 21: 3568-
- 931 74
- 932 Turner MR, Goldacre R, Talbot K, Goldacre MJ (2016) Cerebrovascular injury as a risk factor for
- 933 amyotrophic lateral sclerosis. *Journal of neurology, neurosurgery, and psychiatry* 87: 244-6
- 934 Wang L, Deng HX, Grisotti G, Zhai H, Siddique T, Roos RP (2009) Wild-type SOD1 overexpression
- 935 accelerates disease onset of a G85R SOD1 mouse. *Human molecular genetics* 18: 1642-51
- 936 Warren L, Manos PD, Ahfeldt T, Loh YH, Li H, Lau F, Ebina W, Mandal PK, Smith ZD, Meissner A,
- 937 Daley GQ, Brack AS, Collins JJ, Cowan C, Schlaeger TM, Rossi DJ (2010) Highly efficient
- 938 reprogramming to pluripotency and directed differentiation of human cells with synthetic modified
- 939 mRNA. *Cell Stem Cell* 7: 618-30
- 940 Winkler DD, Schuermann JP, Cao X, Holloway SP, Borchelt DR, Carroll MC, Proescher JB, Culotta
- 941 VC, Hart PJ (2009) Structural and biophysical properties of the pathogenic SOD1 variant
- 942 H46R/H48Q. *Biochemistry* 48: 3436-47
- 943 Zetterström P, Andersen PM, Brännström T, Marklund SL (2011) Misfolded superoxide dismutase-1
- 944 in CSF from amyotrophic lateral sclerosis patients. *J Neurochem* 117: 91-9
- 945 Zetterström P, Graffmo KS, Andersen PM, Brännström T, Marklund SL (2013) Composition of
- 946 soluble misfolded superoxide dismutase-1 in murine models of amyotrophic lateral sclerosis.
- 947 *Neuromolecular Med* 15: 147-58
- 948 Zetterstrom P, Stewart HG, Bergemalm D, Jonsson PA, Graffmo KS, Andersen PM, Brannstrom T,
- 949 Oliveberg M, Marklund SL (2007) Soluble misfolded subfractions of mutant superoxide dismutase-

950 1s are enriched in spinal cords throughout life in murine ALS models. Proc Natl Acad Sci U S A  
951 104: 14157-62  
952

**A**

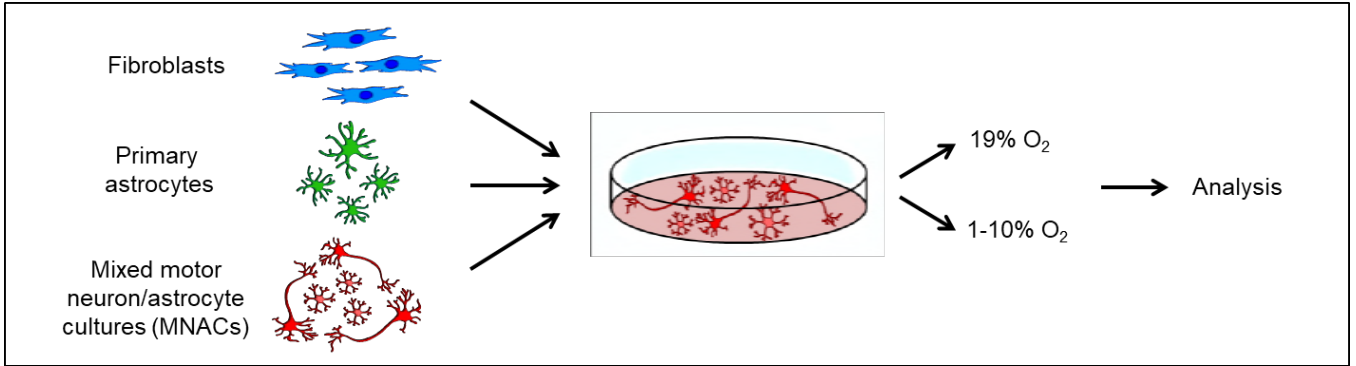

**B**

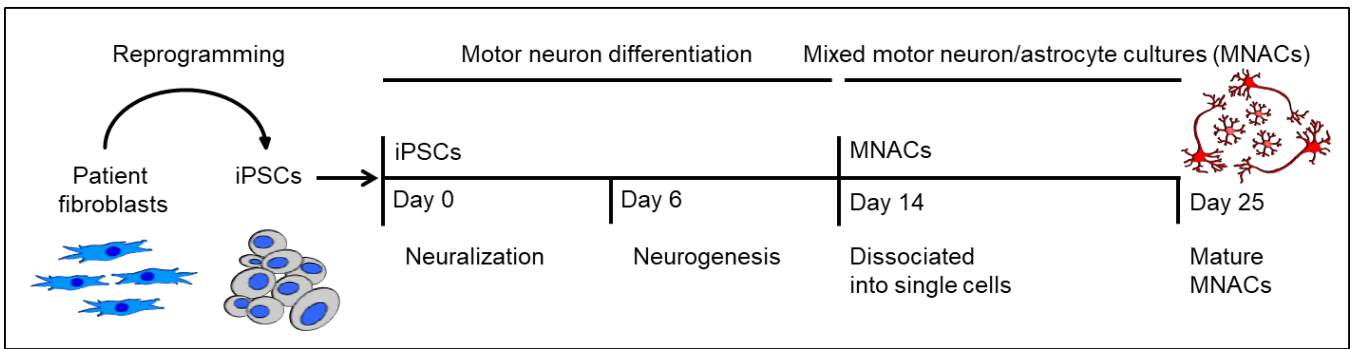

**Figure 2**

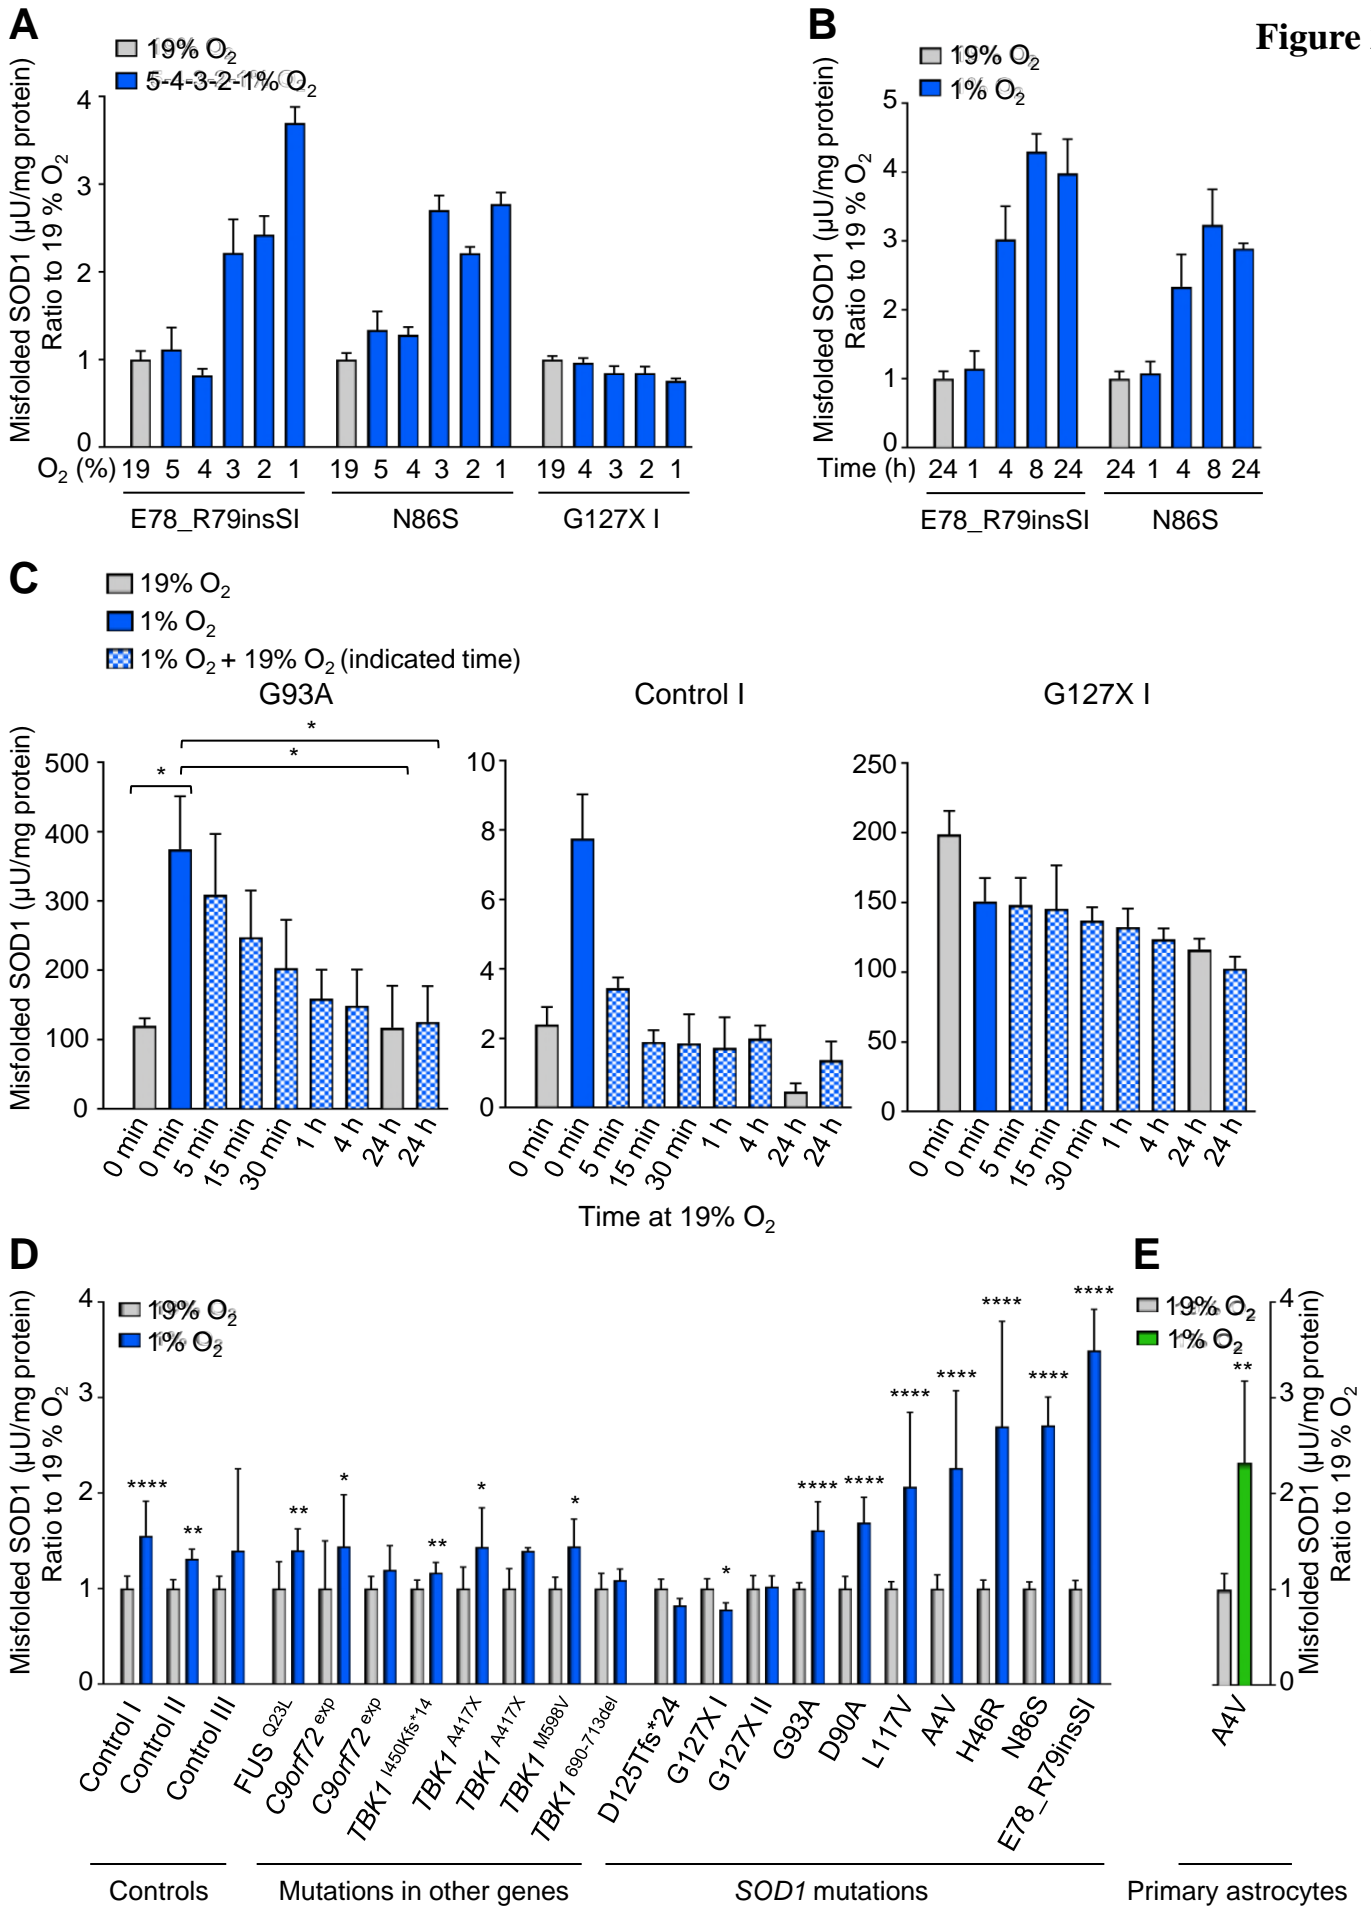

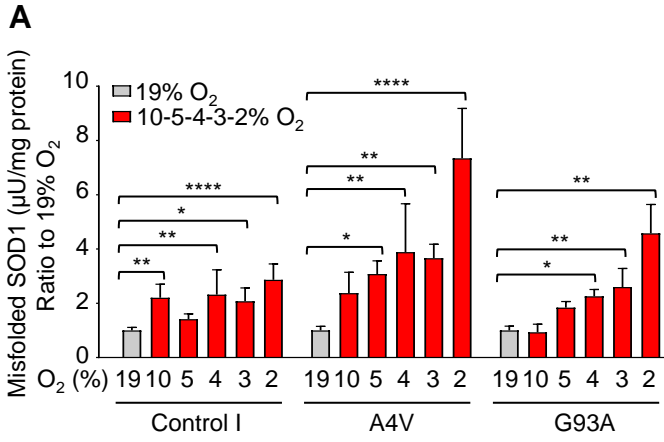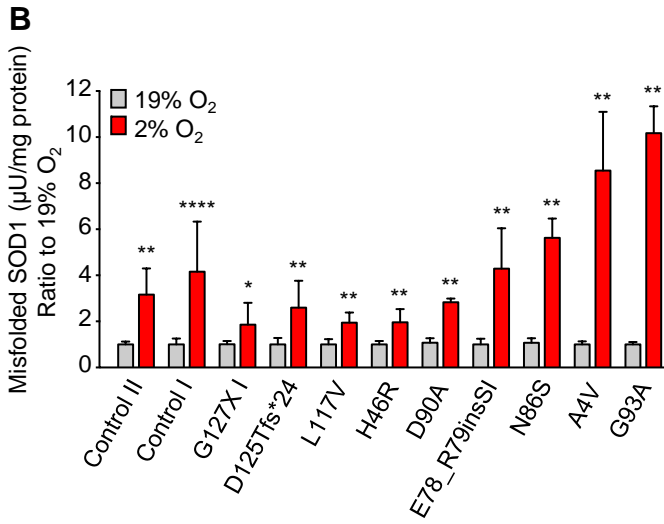

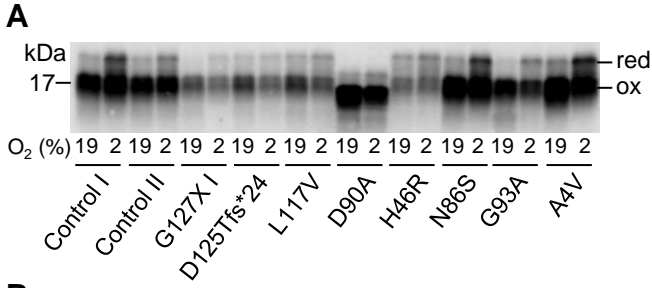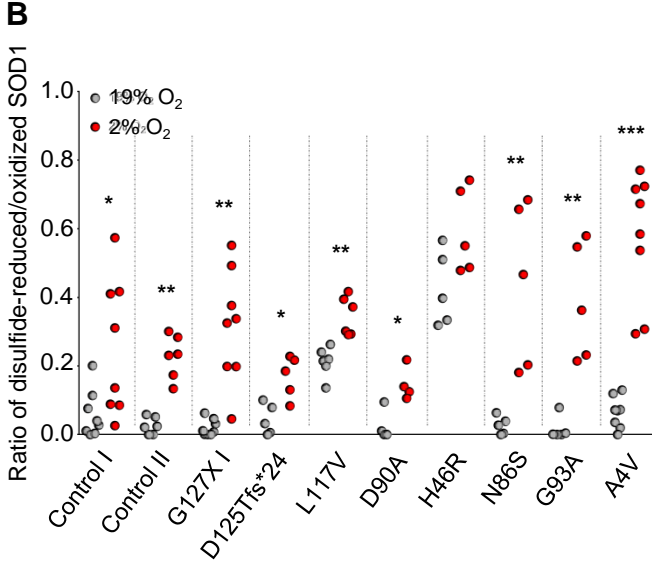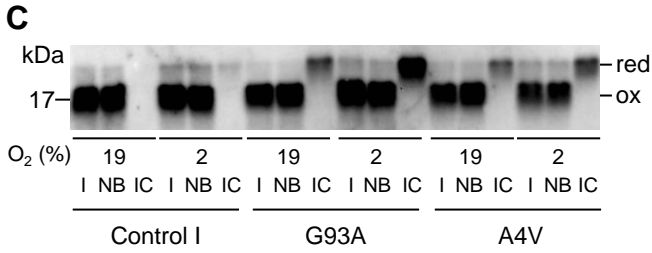



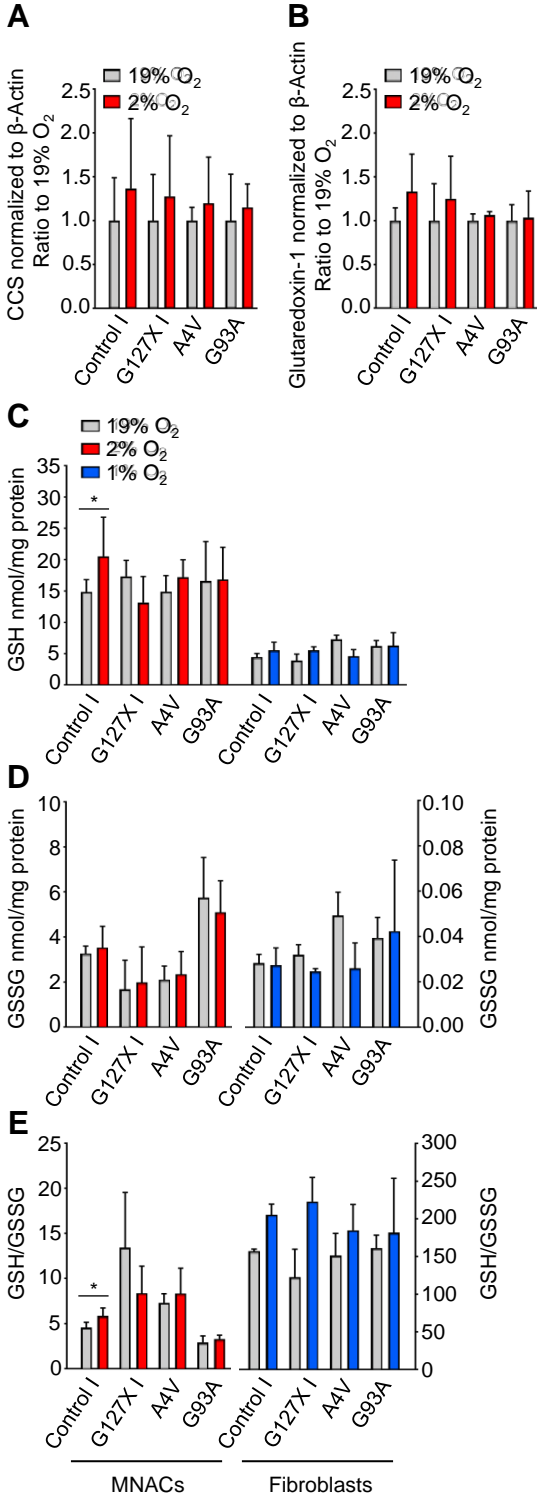

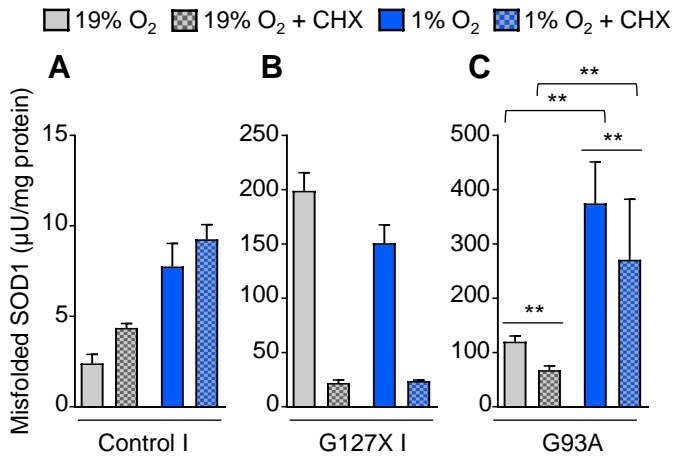

**Figure 7**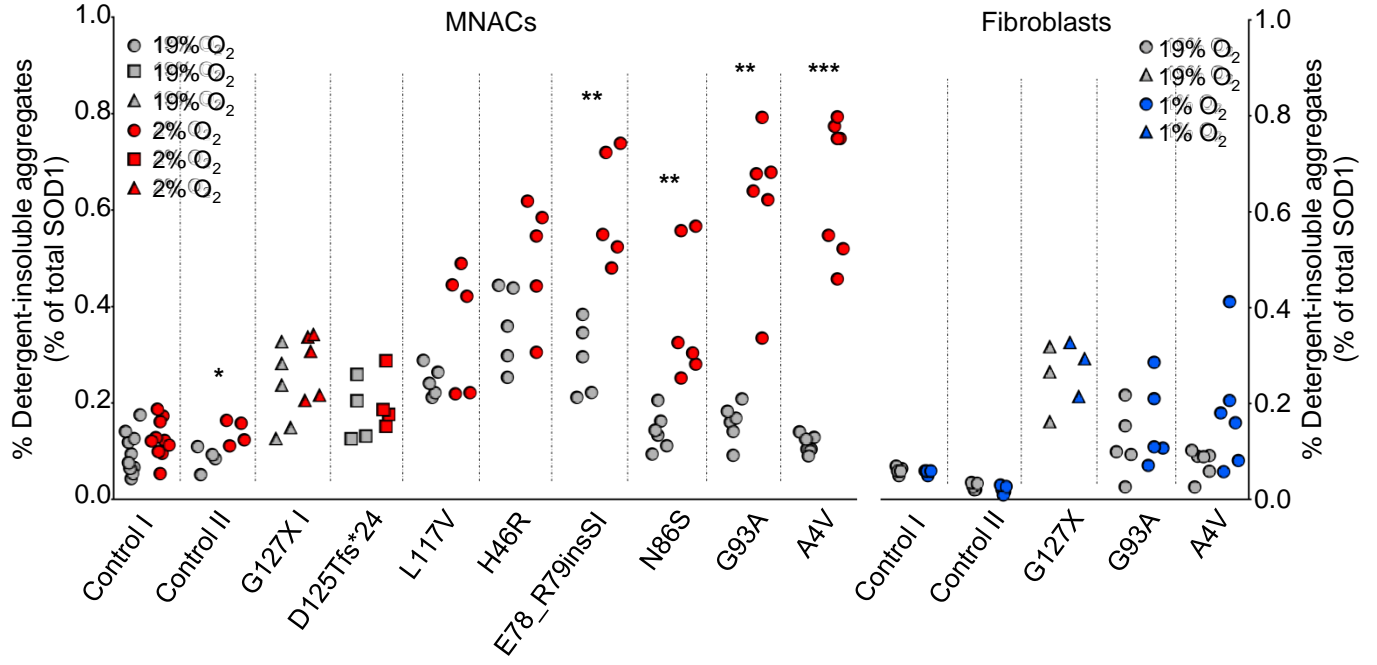

Source: https://www.biorxiv.org/content/10.1101/320283v1.full.pdf
